1

2

3

4 Factors affecting pathogenicity of the turfgrass dollar spot pathogen in natural and  
5 model hosts  
6

7

8

9

10

11

12 Rioux, R.A.<sup>1¶</sup>, Stephens, C.M.<sup>2&</sup>, and J.P. Kerns<sup>2&</sup>

13

14

15 <sup>1</sup> Department of Plant Pathology, University of Wisconsin-Madison, Madison, WI, United States

16 <sup>2</sup> Department of Entomology and Plant Pathology, North Carolina State University, Raleigh, NC,  
17 United States

18

19 \* Corresponding author

20 Email: [cmsteph2@ncsu.edu](mailto:cmsteph2@ncsu.edu) (CMS)

21

22 ¶RR was the primary author. She designed, performed, and analyzed data for all experiments,  
23 and wrote the manuscript.

24 &CMS and JPK contributed ideas for experimentation and experimental design.

25

## 26 **Abstract**

27 *Clarireedia* sp. (formerly called *Sclerotinia homoeocarpa*), the fungal pathogen that causes  
28 dollar spot of turfgrasses, produces oxalic acid but the role of this toxin in *Clarireedia* sp.  
29 pathogenesis is unknown. In the current study, whole plant inoculation assays were used to  
30 evaluate pathogenesis of *Clarireedia* sp. in various model hosts and investigate the role of oxalic  
31 acid in dollar spot disease. These assays revealed that both host endogenous oxalate content and  
32 pathogen-produced oxalic acid influence the timing and magnitude of symptom development. In  
33 time-course expression analysis, oxalate oxidase and related defense-associated germin-like  
34 protein genes in creeping bentgrass showed strong up-regulation starting at 48-72 hpi, indicating  
35 that germin-like protein genes are most likely involved in defense following initial contact with  
36 the pathogen and demonstrating the importance of oxalic acid in *Clarireedia* sp. pathogenesis.  
37 Overall, the results of these studies suggest that oxalic acid and host endogenous oxalate content  
38 are important for pathogenesis by *Clarireedia* sp. and may be associated with the transition from  
39 biotrophy to necrotrophy during host infection.

40 **KEYWORDS:** *Sclerotinia homoeocarpa*, *Clarireedia* sp., *Rutstroemiaceae*, dollar spot, creeping  
41 bentgrass, oxalic acid

42

43

44

45

46

## 47 **Introduction**

48 *Clarireedia* sp. (formerly called *Sclerotinia homoeocarpa*) cause dollar spot in turfgrass,  
49 which is one of the most important diseases of amenity turfgrasses worldwide [1]. Despite the  
50 previous name *Sclerotinia homoeocarpa*, recent literature confirmed that this pathogen is not a  
51 species of *Sclerotinia* or a member of any known genus within the *Rutstroemiaceae* [2]. Renaming  
52 and correct taxonomic placement of *Sclerotinia homoeocarpa* has resulted in the establishment of  
53 a new genus described as *Clarireedia* gen. nov. [2]. A total of four distinct pathogenic species that  
54 cause dollar spot have been characterized within this genus, with *C. jacksonii* and *C. monteithiana*  
55 primarily infecting C3 and C4 grasses in North America, respectively [2]. Isolates evaluated in the  
56 current study were sampled from both C3 and C4 grasses. Therefore, the *C. jacksonii*/*C.*  
57 *monteithiana* are referred to as *Clarireedia* sp. in this text. *Clarireedia* sp. have a broad host range  
58 that spans five plant families [2] and includes economically and ecologically important plants,  
59 such as switchgrass [3], perennial peanut [4], and tufted bulrush [5].

60 Dollar spot is of particular concern in golf course settings because the sunken, silver dollar-  
61 sized spots of diseased turf from which this disease earns its name are aesthetically unappealing  
62 and may negatively affect ball roll. Conditions favoring dollar spot development are broad. The  
63 fungus can grow and cause disease at temperatures ranging from 14-35°C, if relative humidity  
64 remains above 70% [1]. As a result, successful dollar spot management requires periodic fungicide  
65 applications throughout the growing season, making dollar spot the most economically important  
66 disease of turf worldwide [1, 6, 7].

67 Popular turfgrass species that are prone to dollar spot, particularly creeping bentgrass  
68 (*Agrostis stolonifera*, L.), have complex polyploid genomes and are outcrossing which make

69 genetic characterization of dollar spot resistance difficult [8]. To date, only a single study exists  
70 comparing global gene expression among inoculated and non-inoculated creeping bentgrass plants  
71 [9] and dollar spot resistance has been identified on only a few major quantitative trait loci [10].  
72 Moreover, the size of individual turfgrass plants makes it difficult to manipulate and visually assess  
73 disease phenotypes. An acceptable model host would provide a much-needed tool for molecular  
74 and phenotypic characterization of *Clariireedia* sp./host interactions and may be applicable to other  
75 turfgrass pathogens.

76 The vast array of genetic resources for *Arabidopsis thaliana* make it a natural choice as a  
77 model host for any pathosystem. Further, *A. thaliana* has been successfully used in a number of  
78 studies on pathogenicity of *Sclerotinia sclerotiorum* (*Ss*) and *Botrytis cinerea*, both of which  
79 belong to the same fungal order as *Clariireedia* sp. [11, 12, 13, 14, 15, 16]. However, *S.*  
80 *sclerotiorum* and *B. cinerea* are predominantly pathogens of dicots while *Clariireedia* sp. prefer  
81 monocot hosts, indicating that a monocot model host may be more suitable for studies of  
82 *Clariireedia* sp. pathogenesis. Rice is a forerunner in cereal genetic resources [17], but less closely  
83 related to creeping bentgrass and other major turfgrass species than *Brachypodium distachyon*,  
84 barley, or wheat [18, 19]. Studies of host/pathogen interactions and generous genetic resources are  
85 available for all three of these plants, indicating their potential utility as model hosts for  
86 *Clariireedia* sp. Consequently, one of the objectives of the present research was to compare  
87 *Clariireedia* sp. pathogenesis between these five model hosts and the natural host creeping  
88 bentgrass.

89 Identifying pathogenicity mechanisms is important for understanding pathogenesis in  
90 *Clariireedia* sp. Previously, researchers showed that this pathogen produces oxalic acid (OA) [12].  
91 OA is a common phytotoxin and is produced by many important plant pathogens, particularly

92 those in the *Sclerotiniaceae* family [20], to which *Clariireedia* sp. are closely related. *S.*  
93 *sclerotiorum*, a polyphagous necrotrophic plant pathogen with more than 400 hosts [6, 7] relies  
94 heavily on production of OA for successful pathogenesis. While the role of OA in *Ss* pathogenesis  
95 has been extensively studied [21, 15, 14, 7, 22], the function of OA in *Clariireedia* sp. pathogenesis  
96 is not clear.

97 Differences among the *Clariireedia* sp. and *S. sclerotiorum* host ranges indicate that these  
98 pathogens use OA in disparate ways during host colonization. *Clariireedia* sp. primarily infect  
99 monocot species within the family *Poaceae* [2]. Conversely, *S. sclerotiorum* infects a broad range  
100 of dicot species, but is not considered a pathogen on most monocots. Many grass species have  
101 oxalate oxidases that degrade OA, preventing successful infection by *Ss* [23, 24]. Transformation  
102 of dicot hosts with grass oxalate oxidase genes confers partial resistance to *Ss* [26, 27, 28].  
103 Consequently, if OA is an important pathogenicity factor for *Clariireedia* sp., this fungus must use  
104 the phytotoxin in a manner that allows it to circumvent or overcome oxalate oxidase-mediated  
105 plant defenses. Both oxalate oxidase activity [9] and up-regulation of oxalate oxidase encoding  
106 genes occur during *Clariireedia* sp. infection of creeping bentgrass [29], indicating that OA is  
107 produced *in planta* during host colonization. A better understanding of the role of OA in host  
108 colonization by *Clariireedia* sp. and host oxalate oxidase-mediated defenses against *Clariireedia*  
109 sp. may contribute to novel disease management strategies.

110 Based on these observations, the objectives of the present research were to: 1) Investigate  
111 the infection process of *Clariireedia* sp. in creeping bentgrass and various model host systems and  
112 2) determine the role of OA in *Clariireedia* sp./host pathogenesis.

## 113 **Materials and methods**

### 114 **Biological materials.**

#### 115 **Plant materials.**

116 Monocots (S1 Table) were grown from seed and maintained in a growth room with a 14 h  
117 light period at 25±2°C and 10 h dark period at 22±2°C. *Arabidopsis thaliana* and *Nicotiana*  
118 *benthamiana* were grown under similar conditions, except growth chamber conditions were  
119 modified to an 18 h day-length and constant temperature of 26±2°C.

#### 120 **Fungal materials.**

121 Fungal isolates (S2 Table) were maintained on potato dextrose agar (PDA) under ambient  
122 temperature (22±2°C) in growth chambers with a 24 h dark period and transferred weekly to  
123 maintain viability. For long term isolate storage, mycelia were allowed to colonize sterile filter  
124 paper disks on PDA, air dried, placed in glass vials, and stored at -80°C.

#### 125 **Inoculation assays and disease rating.**

126 Monocots were inoculated using the previously described parafilm sachet method [30].  
127 The exact method used differed slightly with host species (S1 Fig). Dicots were inoculated by  
128 placing an agar plug mycelia side down on a fully expanded leaf surface. Flats containing  
129 inoculated dicots were covered with plastic domes to promote relative humidity >90%. Parafilm  
130 alone maintained high relative humidity for monocot inoculations and domes were not needed.  
131 Four-day-old cultures of *Clavireedia* sp. were used for all plant inoculations. Control plants were  
132 mock-inoculated with agar plugs from fresh PDA plates.

133 Symptom severity was rated every 24 h using a rating scale modified from the Horsfall-  
134 Barratt scale (S3 Table) [31]. This method allowed for direct comparison of symptom severity  
135 between species with diverse physical characteristics and symptom phenotypes. To prevent the  
136 possibility of rater-to-rater variability all symptom severity ratings were made by the same  
137 individual.

138 Inoculation experiments were repeated three times with three replicates of each treatment  
139 or treatment combination per experimental repetition (n=9). Data were analyzed with experimental  
140 repetition treated as a random blocking factor and blocks within each repetition treated as a random  
141 factor nested within experimental repetition. Plant species and fungal isolate were both considered  
142 fixed effects.

### 143 **Trypan blue staining and microscopy.**

144 Inoculation and sample collection for all plant hosts and *Clariireedia* sp. isolates were  
145 performed in parallel. Scissors were used to excise plant material surrounding the site of  
146 inoculation and individual tissue samples were placed in 2mL microcentrifuge tubes. Staining and  
147 clearing of tissues were performed as previously described [32]. All samples were visualized with  
148 an Axio Scope.A1 compound microscope (Zeiss, Thornwood, NY). Images were captured with an  
149 AxioCam MRc camera and processed with accompanying AxioVision Real 4.7.1 imaging  
150 software (Zeiss, Thornwood, NY). A minimum of three samples were examined for each time-  
151 point, isolate, and host combination.

### 152 **Whole plant oxalate quantification.**

153 Plants for oxalate quantification were inoculated as previously described. For fresh plant  
154 samples, 0.25 g of tissue were ground in liquid nitrogen with a mortar and pestle then added to a  
155 15 mL centrifuge tube containing 4 mL of 0.2 M  $\text{KH}_2\text{PO}_4$  buffer (pH 6.5) [33]. Tubes containing  
156 ground plant tissue were placed on their sides on an incubator shaker table and mixed overnight  
157 with constant gentle shaking at 90 revolutions per minute at room temperature ( $22\pm 2^\circ\text{C}$ ). The  
158 following day, 2 mL of the liquid portion from each sample tube was transferred to a fresh 15 mL  
159 centrifuge tube and mixed with 2 mL of freshly prepared oxalate quantification kit sample diluent  
160 (Trinity Biotech, Jamestown, NY). The remainder of the oxalate assays were performed according  
161 to the manufacturer's instructions (Trinity Biotech, Jamestown, NY). Oxalate content was  
162 quantified based on absorption at 590 nm with a UV/Vis spectrophotometer (Beckman Coulter,  
163 Brea, CA). A 0.5 mmol oxalate standard was included in each run.

164 Due to the high volume of samples in time-course oxalate studies, samples for this assay  
165 were harvested, weighed, flash frozen in liquid nitrogen, and stored at  $-80^\circ\text{C}$  until use. Pilot studies  
166 indicated that flash freezing did not affect oxalate content in comparison with samples processed  
167 when fresh. Frozen samples were lightly ground in liquid nitrogen with a mortar and pestle, then  
168 transferred to Lysing Matrix A FastPrep tubes (MP Biomedicals, Santa Ana, CA) with 1.5 mL  
169  $\text{KH}_2\text{PO}_4$  buffer and ground in a FastPrep at 6.0 m/s for 40 s (MP Biomedicals, Santa Ana, CA).  
170 Homogenized samples were poured into 15 mL centrifuge tubes and mixed with 1.5 mL sample  
171 diluent. Oxalate quantification was then performed as previously described.

## 172 **Germin-like protein gene expression analysis.**

173 Pots of one-week-old creeping bentgrass turfgrass cultivars '96-2' and 'Focus' were  
174 inoculated with two agars plugs colonized with *Clariireedia* sp. mycelia and covered to maintain



175 humidity >90%. Cultivars '96-2' and 'Focus' were chosen for their low and high resistance to  
176 dollar spot in field trials, respectively (<http://www.ntep.org>). The experiment was arranged as a  
177 two treatment (inoculated and mock-inoculated) by two cultivar ('96-2' and 'Focus') factorial  
178 within a randomized complete block design with four replications. Pots were resampled at 0, 24,  
179 48, 72, and 96 hpi by harvesting 100 mg of tissue from the area surrounding the site of inoculation,  
180 removing roots and leaf blade tips, flash freezing in liquid nitrogen, and storing at -80°C until use.

181         Samples for RNA extraction were ground with a mortar and pestle in 500 µL frozen Trizol  
182 reagent then transferred to 2 mL microcentrifuge tubes containing 500 µL Trizol reagent. RNA  
183 extraction was then performed with the Trizol Plus RNA Purification Kit including the optional  
184 on-column DNase step according to the manufacturer's instructions (Life Technologies, Grand  
185 Island, NY). RNA quality was assessed with an Experion Automated Electrophoresis Station using  
186 the Experion RNA StdSens analysis kit (BioRad, Hercules, CA) and yield was quantified with an  
187 ND-1000 spectrophotometer (Nanodrop, Wilmington, DE). Samples were stored at -80°C until  
188 further use.

189         Synthesis of cDNA and RT-qPCR were performed according to the specifications of the  
190 MIQE guidelines. Prior to cDNA synthesis, a no cDNA control RT-qPCR run was performed on  
191 pure RNA to confirm the absence of contaminating genomic DNA. RNA samples confirmed as  
192 free of genomic DNA were diluted to equivalent concentrations and subjected to cDNA synthesis  
193 with iScript cDNA Synthesis Kit according to the manufacturer's instructions (BioRad, Hercules,  
194 CA). All cDNA synthesis reactions for a single time-point were performed simultaneously to  
195 decrease any inherent variability in the synthesis process. cDNA quality was assessed by  
196 comparing Cq values for potential reference genes and reference genes were selected using  
197 BestKeeper Software [34]. Creeping bentgrass actin (ACT7) and glyceraldehyde phosphate

198 dehydrogenase (GAPDH) genes were selected as stable reference genes for all time-points in both  
199 cultivars.

200 Primers for RT-qPCR were designed from publicly available creeping bentgrass EST  
201 sequences with Primer3 primer design software ([http://www.genome.wi.mit.edu/genome\\_](http://www.genome.wi.mit.edu/genome_)  
202 [software/other/primer3.html](http://www.genome.wi.mit.edu/genome_software/other/primer3.html); S4 Table) and validated by generating efficiency curves from a  
203 dilution series of cDNA pooled from all time-points. For RT-qPCR, cDNA samples were diluted  
204 10-fold and a final volume of 8  $\mu$ L cDNA was used in each of three 20  $\mu$ L technical replicates per  
205 reaction, along with 10  $\mu$ L SsoFast EvaGreen Supermix (BioRad, Hercules, CA), 0.3  $\mu$ M of each  
206 primer, and nuclease free water. All reactions were run in hard-shell skirted 96-well plates with a  
207 white top and clear wells and sealed with Microseal 'B' adhesive film (BioRad, Hercules, CA). A  
208 CFX-96 detection system (BioRad, Hercules, CA) was used for quantification. PCR conditions  
209 were 98°C for 2 m; 40 cycles of 98°C for 2 s and 55°C for 5 s; followed by a dissociation curve  
210 with 80 cycles starting at 70°C for 10 s and increasing in 0.2°C increments per cycle. The  
211 dissociation curve was used to detect primer-dimers and amplification of a single product within  
212 the CFX detection system software (BioRad, Hercules, CA).

213 To calculate relative expression of target genes, transcript abundance was internally  
214 normalized to the two reference genes (actin and elongation factor 1- $\alpha$ ) that were included on each  
215 experimental plate using the formula  $2^{\Delta Cq(\text{target-reference})}$  [35]. Relative expression ratios of target  
216 genes were then calculated using a method based on the previously described  $2^{-\Delta\Delta Cq}$  method [35,  
217 36, 37]. Briefly, normalized target gene Cq values for infected plant tissue were divided by a  
218 calibrator value, which was calculated by averaging the normalized Cq values for all uninfected  
219 96-2 samples from the same time point [35]. This method allowed for comparison between all  
220 treatment levels at each time-point. Statistical analysis was performed on resulting relative

221 expression ratios using the proc mixed procedure in SAS v.9.3 (SAS Institute, Cary, NC).  
222 Orthogonal contrasts were used to compare relative expression ratios between mock-inoculated  
223 and inoculated samples within each cultivar and between the inoculated samples of the two  
224 cultivars.

## 225 **Statistical analysis.**

226 Data analysis was performed using the MIXED, generalized linear mixed model  
227 (GLIMMIX), and regression (REG) procedures in SAS version 9.3. Initial models were fit  
228 including all random factors and interactions with fixed factors. Model fitting criteria (Akaike's  
229 Information Criterion) were then used to remove random factors and interactions not contributing  
230 to variability in order to identify the best model for each data set. Visual analysis of residual plots  
231 and output from PROC UNIVARIATE were used to assess normality of the data. Data were  
232 transformed as necessary to best approximate the normal distribution using the DIST= option in  
233 PROC GLIMMIX. Reported values were back-transformed using the ILINK option. The ANOVA  
234 F-test was used to determine contributions of fixed factors to variability in the measured response  
235 variable(s). Additionally, pre-planned orthogonal contrasts were used to compare between specific  
236 fixed factors.

237 Use of the symptom severity rating scale resulted in data with a non-normal distribution  
238 that could not be corrected through common data transformations available within PROC  
239 GLIMMIX. Consequently, a Friedman's two-way analysis for block designs was employed [38].  
240 For each experimental repetition, the symptom severity for each data point (species by treatment)  
241 was ranked within blocks previously defined during experimental set-up. The resulting ranks were  
242 assessed for normality and agreement between experimental repetitions. The rank data from each

243 experiment repetition was then pooled and analysis of variance was performed with the rank output  
244 as the response variable and both repetition and block(repetition) as random factors.

## 245 **Results**

### 246 **Characterization of the *Clarireedia* sp. infection process on natural** 247 **and model hosts.**

248 Microscopic characterization of infection at various time-points following inoculation was  
249 similar regardless of host (Fig 1). As early as six hours-post inoculation, *Clarireedia* sp. hyphae  
250 were observed growing along cell walls (Fig 1A) and initiating host penetration through infection  
251 pegs (Fig 1A) and stomata (Fig 1B). This resulted in extensive colonization of host tissue,  
252 particularly xylem, shortly following inoculation (Fig 1C-E). Host cell penetration and  
253 colonization continued for at least 72 h. Dead host cells, as indicated by trypan blue staining, were  
254 observed at minimum of 48 hrs after inoculation (Fig 1J-K). Differences in the infection process  
255 were not observed with the four *Clarireedia* sp. isolates used in this study.

256 **Fig 1. Microscopic analysis of plant foliar tissue colonization by *Clarireedia* sp.** In-tact plants  
257 were inoculated and plant samples were taken by excising the area around the site of inoculation.  
258 All samples were cleared of chlorophyll and stained with 0.01% trypan blue. Host penetration was  
259 observed as early as 6 hpi and included: **A)** Growth along cell walls and formation of infection  
260 pegs (arrowheads) projecting directly into host tissue; shown in creeping bentgrass. **B)** Direct  
261 penetration through stomata; shown in barley and **C)** Extensive colonization of host tissue with an  
262 affinity for vascular tissue; shown in barley. At 12 to 24 hpi fungal hyphae continued to grow  
263 along cell walls and form penetration pegs into vascular tissue, as observed in **D)** Creeping

264 bentgrass at 12 hpi **E)** Wheat at 24 hpi and **G)** Rice at 24 hpi. **F)** *Clarireedia* sp. protruding from  
265 a stomate in *Arabidopsis thaliana* tissue colonized by fungal mycelia. **H)** Appressorium  
266 (arrowhead) formed by a *Clarireedia* sp. hypha on barley at 96 hpi. **I)** Extensive host cell death,  
267 as indicated by trypan blue staining outside of fungal hyphae, was not observed until 4-7 dpi  
268 regardless of host. **J)** Extensive cell death 7 dpi inoculation of *Brachypodium distachyon* with  
269 *Clarireedia* sp. **K)** Extensive cell death outside of host vascular tissue at 7 dpi in wheat. Images  
270 are representative of similar observations made for all hosts and *Clarireedia* sp. isolates used in  
271 this study.

272         Symptoms of *Clarireedia* sp. infection were similar in monocot hosts, but differed in the  
273 dicot host *Arabidopsis thaliana* (Fig 2). Inoculation of creeping bentgrass plants resulted in  
274 bleaching and necrosis of the inoculated leaf area (Fig 2F). Within this area, individual leaf blades  
275 with hourglass shaped lesions of white-gray tissue surrounded by reddish-brown borders were  
276 identified (Fig 2E). Similar lesions were observed on the four model monocot hosts (Fig 2A-D).  
277 Occasionally, complete wilting of infected leaves was observed, particularly in the later stages of  
278 infection. Symptoms on *A. thaliana* began as water-soaked lesions, with the affected areas  
279 eventually wilting. These lesions were visually distinct from necrotic lesions typically observed in  
280 studies of *A. thaliana* inoculated with the related pathogen *Ss* [15]. The petiole of the inoculated  
281 *A. thaliana* leaf would become necrotic, constricted, and the symptomatic leaf would often  
282 separate from the plant following severe infection.

283 **Fig 2. Symptoms produced by *Clarireedia* sp. on natural and model host plants.** *Clarireedia*  
284 sp. infected and produced visible symptoms on all host plants. Similar symptoms were observed  
285 on **A)** *Brachypodium distachyon* **B)** Wheat **C)** Barley and **D)** Rice. These symptoms included light  
286 tan to white lesion with reddish brown borders and resembled those observed on **E)** Creeping

287 bentgrass, a natural host. **F)** Creeping bentgrass stand symptoms resulting from our parafilm sachet  
288 inoculation method looked visibly similar to symptoms observed in the field. **G)** Foliar symptoms  
289 observed on *Arabidopsis thaliana* were distinct from those observed on monocot hosts and were  
290 characterized by water soaking and tissue collapse.

291 Analysis of area under the disease progress curve (AUDPC) values revealed a significant  
292 effect of species, but not isolate or isolate x species interaction based on a simple two-way  
293 ANOVA F-test ( $P=0.01$ ) (Fig 3A). In particular, AUDPC values were different between rice and  
294 creeping bentgrass according to a Dunnett's test comparing mean AUDPC values for species  
295 ( $P=0.0043$ ). Overall symptom severity in time-course assays was only affected by host species at  
296 48 hpi ( $P=0.03$ ), when symptoms began to rapidly develop in *B. distachyon* and *O. sativa* (Fig.  
297 3B). However, greater symptom severity was observed in rice at 48, 72, and 96 hpi ( $P<0.05$ ) and  
298 in *B. distachyon* at 48 hpi ( $P=0.01$ ) when compared specifically to creeping bentgrass. No  
299 additional differences in symptom severity between creeping bentgrass and other species were  
300 found. Throughout these experiments, symptom severity on mock-inoculated controls remained at  
301 or near zero.

302 **Fig 3. Symptom severity of *Clariireedia* sp. infection on natural and model hosts.** All plants  
303 were inoculated in the same time in a split-plot RCBD with host as the whole-plot factor and  
304 *Clariireedia* sp. isolate as the sub-plot factor. Three experimental repetitions were conducted and  
305 treated as a random blocking factor in experimental analyses. Blocks within experimental  
306 repetitions were considered random factors nested within repetition. Host, isolate, and host x  
307 isolate interaction were fixed effects. **A)** AUDPC for each *Clariireedia* sp. isolate on the six host  
308 plants. Colored bars represent four different *Clariireedia* sp. isolates. P-values presented are from  
309 a two-way ANOVA with  $\alpha = 0.05$ . Asterisks indicate significant difference from the natural host

310 creeping bentgrass (AS) based on a Dunnett's test with  $\alpha = 0.05$ . Only the AUDPC for rice (OS)  
311 differed from that of creeping bentgrass.  $N \geq 9$  for each species\*isolate combination. **B)** Time-  
312 course progression of infection by *Clavireedia* sp. on all host species. The black asterisk indicates  
313 an overall significant effect of species on symptom severity at 48 hpi, as assessed by one-way  
314 ANOVA. Blue and orange asterisks indicate significant differences between rice and *B. distachyon*  
315 (BD), respectively, and creeping bentgrass at the corresponding time-points based on analysis with  
316 Dunnett's test.  $N \geq 30$  for each species. Abbreviations for both figures are as follows: AS=*Agrostis*  
317 *stolonifera* (creeping bentgrass); AT=*Arabidopsis thaliana*; BD=*Brachypodium distachyon*;  
318 HV=*Hordeum vulgare* (barley); OS=*Oryza sativa* (rice); and TA=*Triticum aestivum* (TA). For  
319 significance codes, \*= $P \leq 0.05$ ; \*\*= $P \leq 0.01$ ; \*\*\*= $P \leq 0.001$ . All error bars represent  $\pm$  one standard  
320 error of the mean.

## 321 **Relationship between host endogenous oxalate content and symptom** 322 **development.**

323 To explore the relationship between *Clavireedia* sp. pathogenicity and OA, the oxalate  
324 content of plants inoculated with *Clavireedia* sp. or mock-inoculated with PDA was compared. A  
325 positive relationship between oxalate content and symptom severity was detected in creeping  
326 bentgrass, barley, and wheat, with  $R^2$  values ranging from 0.33 to 0.52 (Fig 4). The relationship  
327 between oxalate content and symptom severity in rice and *B. distachyon* was also positive, but  
328 lower than for the other species ( $R^2$  values of 0.10 and 0.01, respectively). A negative relationship  
329 between oxalate content and symptom severity was observed in *Arabidopsis thaliana*; however,  
330 correlation was low. Endogenous oxalate content of the six species differed significantly

331 ( $P < 0.0001$ ) and comparisons against creeping bentgrass revealed that both rice and *B. distachyon*  
332 had higher oxalate levels ( $P < 0.0001$ ; Fig 4).

333 **Fig 4. Correlation between host endogenous oxalate content and symptom severity. A)**

334 Endogenous oxalate content of all host species used in this study. Asterisks indicate significant  
335 difference from creeping bentgrass (AS) at the  $\alpha = 0.05$  level using Dunnett's test. Error bars  
336 represent  $\pm$  one standard error of the mean. **B)** Correlation between oxalate content and symptom  
337 severity of *Clariireedia* sp. infection were fit a linear regression model for creeping  
338 bentgrass/*Agrostis stolonifera* (As), *Arabidopsis thaliana* (At), *Brachypodium distachyon* (Bd),  
339 barley/*Hordeum vulgare* (Hv), rice/*Oryza sativa* (Os), and wheat/*Triticum aestivum* (Ta). All  
340 regression equations,  $R^2$ , and P-values were obtained from models fit with SAS proc reg. For  
341 significance codes,  $* = P \leq 0.05$ ;  $** = P \leq 0.01$ ;  $*** = P \leq 0.001$ . All error bars represent  $\pm$  one standard  
342 error of the mean.

343 A time-course experiment was performed to compare symptom severity and oxalate  
344 content between *Clariireedia* sp.-inoculated and mock-inoculated plants during the progression of  
345 infection. Creeping bentgrass was selected to represent species with low oxalate content and *B.*  
346 *distachyon* was selected to represent species with high oxalate content. *B. distachyon* was selected  
347 over *O. sativa* because symptom severity and genetics were more similar to creeping bentgrass  
348 [18]. Oxalate content in *Clariireedia* sp.-inoculated plants gradually increased over time and  
349 paralleled the development of symptoms (Fig 5A). Oxalate content in mock-inoculated plants  
350 remained low throughout the experiment. Significant differences between the oxalate content in  
351 *Clariireedia* sp. and mock-inoculated creeping bentgrass developed at 48 hpi ( $P = 0.004$ ) and 120  
352 hpi ( $P < 0.0001$ ). Conversely, oxalate content of inoculated and mock-inoculated *B. distachyon*  
353 plants remained relatively stable over time (Fig 5C). The oxalate content of inoculated and mock-



354 inoculated *B. distachyon* only differed significantly at 120 hpi ( $p=0.003$ ). Oxalate content  
355 correlated to symptom severity in both hosts ( $P<0.0001$ ), but 75% of the variability in symptom  
356 severity was explained by oxalate content in creeping bentgrass, compared to only 28% in *B.*  
357 *distachyon*.

358 **Fig 5. Time-course for the relationship between symptom severity and oxalate content in**  
359 **creeping bentgrass and *Brachypodium distachyon*.** **A)** Time-course of symptom severity and  
360 oxalate content in creeping bentgrass. Asterisks indicate difference between oxalate content in  
361 *Clariireedia* sp. and mock-inoculated plants by one-way ANOVA with a cut-off value of  $\alpha=0.05$ .  
362 Errors bars represent  $\pm$  one standard error of the mean. **B)** Scatter plot showing the correlation  
363 between oxalate content and symptom severity for creeping bentgrass. Regression line calculated  
364 from simple linear regression in SAS proc reg. **C)** Time-course of symptom severity and oxalate  
365 content in *B. distachyon*. Asterisks indicate difference between oxalate content in *Clariireedia* sp.  
366 and mock-inoculated plants by one-way ANOVA with a cut-off value of  $\alpha=0.05$ . Errors bars  
367 represent  $\pm$  one standard error of the mean. **D)** Scatter plot showing the correlation between oxalate  
368 content and symptom severity for *B. distachyon*. Regression line calculated from simple linear  
369 regression in SAS proc reg. For significance codes,  $*=P\leq 0.05$ ;  $**=P\leq 0.01$ ;  $***=P\leq 0.001$ . All error  
370 bars represent  $\pm$  one standard error of the mean.

371 To further elucidate the influence of pathogen-produced OA relative to plant endogenous  
372 oxalate content on symptom development in creeping bentgrass and *B. distachyon*, the  
373 aggressiveness of *Clariireedia* sp. isolates producing varying levels of OA in culture was compared  
374 (Fig 6). Isolates A1421, HE10G19, and ML75 produced high, low, and moderate amounts of OA,  
375 respectively, based on acidification of bromophenol blue amended medium assays (Fig S2) [39].  
376 Orthogonal contrasts were used to compare symptom severity between HE10G19 (low OA prod)

377 and the remaining two isolates at each time point (Fig 6). On creeping bentgrass, aggressiveness  
378 of isolates differed at 72 hpi. From this point on, HE10G19 was less aggressive than the other two  
379 isolates ( $p \leq 0.05$ ; Fig 6B). Aggressiveness among the *Clariireedia* sp. isolates did not vary on *B.*  
380 *distachyon* (Fig 6C).

381 **Fig 6. Progression of infection on creeping bentgrass and *Brachypodium distachyon* by**  
382 ***Sclerotinia homoeocarpa* isolates with varying oxalic acid production capacities.** Isolates  
383 producing high, moderate, and low amounts of oxalic acid were selected based on their ability to  
384 produce a color change in pH indicator-amended media (S2 Fig). In line graphs, red, green, and  
385 blue lines indicate isolates with high, moderate, and low oxalic acid production abilities,  
386 respectively. Creeping bentgrass and *B. distachyon* experiments were performed in tandem. Values  
387 shown in these graphs represent the means from the three experimental repetitions. **A)** Time-course  
388 of symptom development and **B)** AUDPC of symptom severity on creeping bentgrass. **C)** Time-  
389 course of symptom development and **B** AUDPC of symptom severity on *B. distachyon*. Asterisks  
390 in **A** represent a significant effect of isolate in one-way ANOVA with  $\alpha=0.05$ . P-values in **B** were  
391 obtained through orthogonal contrasts comparing the AUDPC means between the isolates  
392 indicated. No difference between isolates was detected for *B. distachyon*. For significance codes,  
393  $*=P \leq 0.05$ ;  $**=P \leq 0.01$ ;  $***=P \leq 0.001$ . All error bars represent  $\pm$  one standard error of the mean.

## 394 **Comparison of oxalate oxidase expression in creeping bentgrass** 395 **cultivars.**

396 A previous study determined various germin-like protein (GLP) genes, including oxalate  
397 oxidases, were some of the most up-regulated genes in the dollar spot susceptible cultivar  
398 ‘Crenshaw’ 96 hpi with *Clariireedia* sp. [29]. In the present study, RT-qPCR was used to compare

399 the expression of oxalate oxidase and other germin-like protein genes between cultivars considered  
400 resistant and susceptible to *Claviceps* sp. Four genes of interest were selected for RT-qPCR  
401 analysis of expression through sequence alignment and phylogenetic analysis of creeping  
402 bentgrass ESTs and known GLP genes from barley, rice, and *B. distachyon* (S3 Fig). Expression  
403 was tested by extracting total RNA from four independent pots of *Claviceps* sp.-inoculated or  
404 mock-inoculated resistant and susceptible creeping bentgrass cultivars. All four of these genes  
405 were up-regulated in both resistant and susceptible cultivars by 96 hpi in *C. Claviceps* sp.-  
406 inoculated versus mock-inoculated control plants (Figs 7 and S3). The oxalate oxidase gene,  
407 AST\_798, was up-regulated in the susceptible cultivar at 48, 72, and 96 hpi. Expression of  
408 AST\_798 was stronger in the susceptible cultivar when compared to the resistant cultivar 48 and  
409 72 hpi. AST\_798 was only up-regulated in the resistant cultivar at 96 hpi (Fig 7A). Similarly,  
410 AST\_854, a creeping bentgrass gene grouping with defense-associated GLP genes from barley  
411 and rice in phylogenetic analysis, was up-regulated in the susceptible cultivar at 72 and 96 hpi, but  
412 only at 96 hpi in the resistant cultivar (Fig 7B). Similar expression patterns were observed for two  
413 more creeping bentgrass GLP genes that did not group with known defense-associated GLPs in  
414 phylogenetic analysis (S3 Fig).

415 **Fig 7. Time-course expression of oxalate oxidase and another germin-like protein gene in**  
416 **resistant and susceptible creeping bentgrass cultivars. A)** Time-course expression of the creeping  
417 bentgrass oxalate gene AST\_798. **B)** Time-course expression for the creeping bentgrass GLP GER4 subfamily  
418 gene AST\_854. Relative expression ratios shown were normalized the constitutively expressed creeping  
419 bentgrass ACT7 reference gene. Similar results were obtained with the creeping bentgrass GAPDH gene. In the  
420 legend for both **A** and **B**, ‘S’ and ‘R’ represent the ‘susceptible’ and ‘resistant’ cultivar, respectively; ‘Sh’ and  
421 ‘PDA’ indicate ‘*Claviceps* sp.-inoculated’ and ‘PDA mock-inoculated’ samples, respectively. Orthogonal  
422 contrasts were used to compare relative expression ratios between specific treatment pairs at the  $\alpha=0.05$  level.

423 Black asterisks indicate a significant difference between relative expression ratios for the *Clariireedia* sp.-  
424 inoculated resistant and susceptible cultivar; blue asterisks indicate a significant difference the *Clariireedia* sp.  
425 and mock-inoculated samples for the susceptible cultivar; red asterisks indicate a significant difference between  
426 the *Clariireedia* sp. and mock-inoculated control for the resistant cultivar. For significance codes, \*=P≤0.05;  
427 \*\*=P≤0.01; \*\*\*=P≤0.001. All error bars represent ± one standard error of the mean.

## 428 **Discussion**

429 A primary objective of the present research was to identify a host species for use as a model  
430 system to study *Clariireedia* sp. pathogenesis and host resistance. The lack of a significant species  
431 by isolate interaction in this research supports previous findings in turfgrass hosts that indicate a  
432 lack of race specificity in *Clariireedia* sp./host interactions [10]. Therefore a few model host  
433 cultivars or accessions with high and low resistance to dollar spot disease could be used to dissect  
434 molecular and physiological aspects of host resistance to this pathogen. We detected differences  
435 in disease severity and symptom development between species, indicating that not all are equally  
436 suited as a model system for *Clariireedia* sp. and that *A. thaliana* is not a suitable model host for  
437 *Clariireedia* sp. The correlation between symptom severity and endogenous oxalate was an  
438 unexpected finding. Model hosts with varying levels of endogenous oxalate content may be useful  
439 further studies of *Clariireedia* sp./host interactions and how they are affected by endogenous host  
440 oxalate levels. Soybean cultivars [40] and spinach varieties [41] differ in oxalate content in the  
441 field suggesting natural variation in oxalate levels is common in plant species and should be readily  
442 identifiable in a chosen model host system. We are unaware of previous reports that plant  
443 endogenous oxalate levels influence resistance to fungal pathogens; however, oxalate is known to  
444 influence resistance to herbivory by some insects [42, 43].

445 To our knowledge, a correlation between host endogenous oxalate content and  
446 susceptibility to *Clavireedia* sp. has not previously been demonstrated for creeping bentgrass or  
447 any other turfgrass species. Plants produce and use oxalate for a variety of purposes, including  
448 defense, pH regulation, osmoregulation, and calcium homeostasis [44] Thus, oxalate content can  
449 vary widely between cultivars and environments. Correspondingly, resistance to dollar spot is  
450 inherited quantitatively and largely dependent upon environmental conditions [45, 46, 47, 10]. It  
451 is possible that oxalate content contributes to dollar spot resistance and this is a hypothesis that  
452 should be assessed in cultivars with varying levels of resistance to dollar spot disease.

453 In addition to genetic differences in creeping bentgrass cultivar oxalate content,  
454 management and environmental factors could also be used to alter this host characteristic. It has  
455 been reported that fertilizers high in ammonium content and low in nitrate are most effective at  
456 suppressing dollar spot in field trials [48]. This is of note because specific forms of nitrogen, in  
457 particular nitrate, can affect plant oxalate levels [44]. Promotion or reduction of turfgrass oxalate  
458 content could occur in response to different fertilization regimes and suggests a novel means by  
459 which nutrient management could be used to manage dollar spot. Further studies in the both the  
460 field and lab are needed to better understand the relationship between creeping bentgrass cultivar  
461 oxalate content and dollar spot resistance. Additionally, studies that investigate the effects of  
462 cultural practices, such as fertilization, on both dollar spot resistance and plant oxalate content will  
463 be useful in identifying best management practices for dollar spot suppression. Due to the  
464 correlative nature of these studies, it is also possible that it is not the oxalate content specifically  
465 that determines the outcome of the host/pathogen interaction but related factors such as foliar pH  
466 or pH within the plant.

467 Germin-like proteins are considered an important part of grass basal defense mechanisms  
468 [10, 49]. Consequently, the slow increase in expression of oxalate oxidase and other GLP genes in  
469 this study was unexpected. Orshinsky et al. [29] also found strong induction of GLP genes in  
470 creeping bentgrass 96 hpi inoculation with *Clariireedia* sp. Interestingly, expression of these genes  
471 in creeping bentgrass parallels the timing of symptom appearance and increased more rapidly in  
472 the susceptible cultivar compared to the resistant cultivar in this study. One possible reason for the  
473 delayed expression of host oxalate oxidase genes is that they are activated in the plant as  
474 *Clariireedia* sp. transitions from biotrophy to necrotrophy following early stages of pathogenesis.  
475 This hypothesis corresponds with our microscopic examinations of the *Clariireedia* sp. infection  
476 process, which demonstrated hyphal growth within host tissue prior to cell death. Alternatively,  
477 oxalate oxidase and other GLP genes may be expressed by creeping bentgrass only after detection  
478 of pathogen-produced OA. *Brassica napus* GLP genes are induced as early as 6 hpi with *S.*  
479 *sclerotiorum* but it is unclear if expression is related to detection of OA or other signs of pathogen  
480 infection [51]. Transient induction of GLP gene expression could have occurred at time-points  
481 before the 24 h initial sample collection in this study. Other components of experimental design  
482 such as age of the host or tissue collection timing post inoculation could have interfered with our  
483 ability to detect changes in gene expression at early time points. Functional studies with plants  
484 overexpressing or lacking oxalate oxidase and other GLP genes will help to better identify the  
485 importance of these genes in host resistance to *Clariireedia* sp.

486 *Sclerotinia sclerotiorum* isolates deficient in OA production are hypovirulent or non-  
487 pathogenic [39, 52]. Similarly, hypovirulent isolates of the chestnut blight fungus, *Cryphonectria*  
488 *parasitica*, produce lower amounts of OA *in vitro* than their virulent counterparts [53]. In this  
489 research, we found that a *Clariireedia* sp. isolate deficient in OA production had decreased

490 aggressiveness on creeping bentgrass but not on *B. distachyon* (Fig 6), indicating that OA  
491 contributes to aggressiveness but is not a pathogenicity determinant for *Clariireedia* sp. and that  
492 *Clariireedia* sp. with reduced OA production may infect more efficiently on hosts with higher  
493 endogenous oxalate content. Similarly, the symptoms observed on *A. thaliana* were visibly distinct  
494 from those observed on monocots and no increase in oxalate content was found in symptomatic *A.*  
495 *thaliana* leaves, suggesting that other pathogenesis mechanisms, such as cell wall degrading  
496 enzymes, are likely responsible for infection of this host.

497         Based on the present research, both host endogenous oxalate content and pathogen-  
498 produced OA affect interactions between *Clariireedia* sp. and its hosts. Results indicating that  
499 creeping bentgrass cultivars with resistance to dollar spot have lower oxalate levels than  
500 susceptible cultivars is the first indication that this physiological host characteristic is correlated  
501 with dollar spot resistance. Further studies on the relationship between oxalate content and  
502 resistance to dollar spot are needed, but this has potential as a quantifiable trait for selection of  
503 resistant clones in creeping bentgrass breeding programs. A limitation to our studies was the lack  
504 of genetic resources for *Clariireedia* sp. and one of its natural hosts, creeping bentgrass; however,  
505 we were able to identify potential model systems for study of *Clariireedia* sp./host interactions in  
506 this research. In the future, use of a model host system and development of functional genetic  
507 resources for *Clariireedia* sp. will enable elucidation of the importance of host oxalate and  
508 pathogen-produced OA for pathogenesis of this fungus.

## 509 **Acknowledgements**

510         We would like to thank the staff and students at the O.J. Noer Turfgrass Research  
511 and Education Facility for their efforts in this research. Thank you to the University of Wisconsin-  
512 Madison and Department of Plant Pathology for the support and oversight.

## 513 **References**

- 514 1. Kerns, J. P., and Tredway, L. P. *Turfgrass: Biology, Use, and Management*. American Society  
515 of Agronomy, Crop Science Society of America, Soil Science Society of America. 2013.
- 516 2. Salazar-Salgado C.; L. A. Beirn; A. Ismaiel; M. J. Boehm; I. Carbone; A.I. Putman; L. P.  
517 Treadway; B. B. Clarke; and J. A. Crouch. *Clarireedia*: A new fungal genus comprising four  
518 pathogenic species responsible for dollar spot disease of turfgrass. *Fungal Biology*. 2018; 122,  
519 761-773.
- 520 3. Vu, A. L., Gwinn, K. D., and Ownley, B. H. First Report of Dollar Spot Caused by *Sclerotinia*  
521 *homoeocarpa* on Switchgrass in the United States. 2011.
- 522 4. Hoover, R. J. First Report of a Leaf Spot on Perennial Peanut Caused by *Sclerotinia*  
523 *homoeocarpa*. *Plant Dis*. 1995; 79:1249.
- 524 5. Hsiang, T., Shi, F., and Darbyson, A. First Report of *Sclerotinia homoeocarpa* from the  
525 Sedge *Trichophorum cespitosum* in Eastern Canada, Which Causes Dollar Spot Disease  
526 on *Lolium perenne* and *Poa pratensis* but not on *Agrostis stolonifera*. *Plant Dis*. 2014;  
527 98:161–161.
- 528 6. Boland, G. J., and Hall, R. Index of plant hosts of *Sclerotinia sclerotiorum*. *Can. J. Plant*  
529 *Pathol*. 1994; 16:93–108.
- 530 7. Bolton, M. D., Thomma, B. P. H. J., and Nelson, B. D. *Sclerotinia sclerotiorum* (Lib.) de Bary:  
531 biology and molecular traits of a cosmopolitan pathogen. *Mol. Plant Pathol*. 2006; 7:1–  
532 16.
- 533 8. Bonos, S. A., and Huff, D. R. *Turfgrass: Biology, Use, and Management*. American Society of  
534 Agronomy, Crop Science Society of America, Soil Science Society of America. 2013.



- 535 9. Orshinsky, A. M., Hu, J., Opiyo, S. O., Reddyvari-Channarayappa, V., Mitchell, T. K., and  
536 Boehm, M. J. RNA-Seq Analysis of the *Sclerotinia homoeocarpa* – Creeping Bentgrass  
537 Pathosystem ed. Ying Xu. PLoS One. 2012; 7:e41150.
- 538 10. Chakraborty, N., Curley, J., Warnke, S., Casler, M. D., and Jung, G. Mapping QTL for dollar  
539 spot resistance in creeping bentgrass (*Agrostis stolonifera* L.). Theor. Appl. Genet. 2006;  
540 113:1421–35.
- 541 11. Beneloujaephajri, E., Costa, A., L'haridon, F., Métraux, J.-P., and Binda, M. Production of  
542 reactive oxygen species and wound-induced resistance in *Arabidopsis thaliana* against  
543 *Botrytis cinerea* are preceded and depend on a burst of calcium. BMC Plant Biol. 2013;  
544 13:160.
- 545 12. Dickman, M. B., and Mitra, A. *Arabidopsis thaliana* as a model for studying *Sclerotinia*  
546 *sclerotiorum* pathogenesis. Physiol. Mol. Plant Pathol. 1992; 41:255–263.
- 547 13. Guo, X., and Stotz, H. U. Defense against *Sclerotinia sclerotiorum* in *Arabidopsis* is  
548 dependent on jasmonic acid, salicylic acid, and ethylene signaling. Mol. Plant. Microbe.  
549 Interact. 2007; 20:1384–95.
- 550 14. Han, L., Li, G.-J., Yang, K.-Y., Mao, G., Wang, R., Liu, Y., and Zhang, S. Mitogen-activated  
551 protein kinase 3 and 6 regulate *Botrytis cinerea*-induced ethylene production in  
552 *Arabidopsis*. Plant J. 2010; 64:114–27.
- 553 15. Kabbage, M., Williams, B., and Dickman, M. B. Cell death control: the interplay of apoptosis  
554 and autophagy in the pathogenicity of *Sclerotinia sclerotiorum*. ed. Brett Tyler. PLoS  
555 Pathog. 2013; 9:e1003287.
- 556 16. Noyes, R. D., and Hancock, J. G. Role of oxalic acid in the *Sclerotinia* wilt of sunflower.  
557 Physiol. Plant Pathol. 1981; 18:123–132.

- 558 17. Krishnan, A., Guiderdoni, E., An, G., Hsing, Y. C., Han, C., Lee, M. C., Yu, S.-M., Upadhyaya,  
559 N., Ramachandran, S., Zhang, Q., Sundaresan, V., Hirochika, H., Leung, H., and Pereira, A.  
560 Mutant resources in rice for functional genomics of the grasses. *Plant Physiol.* 2009;  
561 149:165–70.
- 562 18. Araneda, L., Sim, S.-C., Bae, J.-J., Chakraborty, N., Curley, J., Chang, T., Inoue, M., Warnke, S.,  
563 and Jung, G. Comparative Genome Analysis between *Agrostis stolonifera* and Members of  
564 the Pooideae Subfamily, including *Brachypodium distachyon* ed. Giovanni G. Vendramin.  
565 *PLoS One.* 2013; 8:e79425.
- 566 19. Rotter, D., Bharti, A. K., Li, H. M., Luo, C., Bonos, S. a, Bughrara, S., Jung, G., Messing, J.,  
567 Meyer, W. a, Rudd, S., Warnke, S. E., and Belanger, F. C. Analysis of EST sequences suggests  
568 recent origin of allotetraploid colonial and creeping bentgrasses. *Mol. Genet. Genomics.*  
569 2007; 278:197–209.
- 570 20. Andrew, M., Barua, R., Short, S. M., and Kohn, L. M. Evidence for a common toolbox based  
571 on necrotrophy in a fungal lineage spanning necrotrophs, biotrophs, endophytes, host  
572 generalists and specialists. ed. Jason E. Stajich. *PLoS One.* 2012; 7:e29943.
- 573 21. Heller, A., and Witt-Geiges, T. Oxalic acid has an additional, detoxifying function in  
574 *Sclerotinia sclerotiorum* pathogenesis. *PLoS One.* 2013; 8:e72292.
- 575 22. Kim, K. S., Min, J.-Y., and Dickman, M. B. Oxalic acid is an elicitor of plant programmed cell  
576 death during *Sclerotinia sclerotiorum* disease development. *Mol. Plant. Microbe. Interact.*  
577 2008; 21:605–12.
- 578 23. Bernier, F., and Berna, A. Germins and germin-like proteins: Plant do-all proteins. But  
579 what do they do exactly? *Plant Physiol. Biochem.* 2001; 39:545–554.

- 580 24. Van Loon, L. C., Rep, M., and Pieterse, C. M. J. Significance of inducible defense-related  
581 proteins in infected plants. *Annu. Rev. Phytopathol.* 2006; 44:135–62.
- 582 25. Novak, L. A., and Kohn, L. M. Electrophoretic and Immunological Comparisons of  
583 Developmentally Regulated Proteins in Members of the Sclerotiniaceae and Other  
584 Sclerotial Fungi. *Appl. Envir. Microbiol.* 1991; 57:525–534.
- 585 26. Donaldson, P. A., Anderson, T., Lane, B. G., Davidson, A. L., and Simmonds, D. H. Soybean  
586 plants expressing an active oligomeric oxalate oxidase from the wheat *gf-2.8* (*germin*)  
587 gene are resistant to the oxalate-secreting pathogen *Sclerotinia sclerotiorum*. *Physiol. Mol.*  
588 *Plant Pathol.* 2001; 59:297–307.
- 589 27. Dong, X., Ji, R., Guo, X., Foster, S. J., Chen, H., Dong, C., Liu, Y., Hu, Q., and Liu, S. Expressing  
590 a gene encoding wheat oxalate oxidase enhances resistance to *Sclerotinia sclerotiorum*  
591 in oilseed rape (*Brassica napus*). *Planta.* 2008; 228:331–40.
- 592 28. Hu, X., Bidney, D. L., Yalpani, N., Duvick, J. P., Crasta, O., Folkerts, O., and Lu, G.  
593 Overexpression of a Gene Encoding Hydrogen Peroxide- Generating Oxalate Oxidase  
594 Evokes Defense Responses in Sunflower. 2003; 133:170–181.
- 595 29. Orshinsky, A. M., Boehm, M. J., and Boland, G. J. Plant wounding and *Ophiostoma mitovirus*  
596 3a (OMV3a) influence infection of creeping bentgrass by *Sclerotinia homoeocarpa*. *Can.*  
597 *J. Plant Pathol.* 2012; 34:493–506.
- 598 30. Jia, Y., Liu, G., Park, D.-S., and Yang, Y. Inoculation and scoring methods for rice sheath  
599 blight disease. *Methods Mol. Biol.* 2013; 956:257–68.
- 600 31. Horsfall, J. G., and Barratt, R. W. An improved grading system for measuring plant  
601 diseases. *Phytopathology.* 1945; 35:655.

- 602 32. Chung, C.-L., Longfellow, J. M., Walsh, E. K., Kerdieh, Z., Van Esbroeck, G., Balint-Kurti, P.,  
603 and Nelson, R. J. Resistance loci affecting distinct stages of fungal pathogenesis: use of  
604 introgression lines for QTL mapping and characterization in the maize--*Setosphaeria*  
605 *turcica* pathosystem. *BMC Plant Biol.* 2010; 10:103.
- 606 33. Ferrar, P. H., and Walker, J. R. L. O-Diphenol oxidase inhibition—an additional role for  
607 oxalic acid in the phytopathogenic arsenal of *Sclerotinia sclerotiorum* and *Sclerotium*  
608 *rolfsii*. *Physiol. Mol. Plant Pathol.* 1993; 43:415–422.
- 609 34. Bustin, S. A., Benes, V., Garson, J. A., Hellemans, J., Huggett, J., Kubista, M., Mueller, R., Nolan,  
610 T., Pfaffl, M. W., Shipley, G. L., Vandesompele, J., and Wittwer, C. T. The MIQE guidelines:  
611 minimum information for publication of quantitative real-time PCR experiments. *Clin.*  
612 *Chem.* 2009; 55:611–22.
- 613 35. Hogan, C. S., Mole, B. M., Grant, S. R., Willis, D. K., and Charkowski, A. O. The type III  
614 secreted effector DspE is required early in *solanum tuberosum* leaf infection by  
615 *Pectobacterium carotovorum* to cause cell death, and requires Wx(3-6)D/E motifs. ed.  
616 Stefan Bereswill. *PLoS One.* 2013; 8:e65534.
- 617 36. Pfaffl, M. W., Tichopad, A., Prgomet, C., and Neuvians, T. P. Determination of stable  
618 housekeeping genes, differentially regulated target genes and sample integrity:  
619 BestKeeper--Excel-based tool using pair-wise correlations. *Biotechnol. Lett.* 2004;  
620 26:509–15.
- 621 37. Rotenberg, D., Thompson, T. S., German, T. L., and Willis, D. K. Methods for effective real-  
622 time RT-PCR analysis of virus-induced gene silencing. *J. Virol. Methods.* 2006; 138:49–  
623 59.
- 624 38. Conover, W. *Practical Nonparametric Statistics.* John Wiley & Sons. 1998.

- 625 39. Godoy, G., Steadman, J. R., Dickman, M. B., and Dam, R. Use of mutants to demonstrate the  
626 role of oxalic acid in pathogenicity of *Sclerotinia sclerotiorum* on *Phaseolus vulgaris*.  
627 *Physiol. Mol. Plant Pathol.* 1990; 37:179–191.
- 628 40. Massey, L. K., Palmer, R. G., and Horner, H. T. Oxalate Content of Soybean Seeds ( *Glycine*  
629 *max*: *Leguminosae*), Soyfoods, and Other Edible Legumes. *J. Agric. Food Chem.* 2001;  
630 49:4262–4266.
- 631 41. Kawazu, Y., Okimura, M., Ishii, T., and Yui, S. Varietal and seasonal differences in oxalate  
632 content of spinach. *Sci. Hortic. (Amsterdam)*. 2003; 97:203–210.
- 633 42. Korth, K. L., Doege, S. J., Park, S.-H., Goggin, F. L., Wang, Q., Gomez, S. K., Liu, G., Jia, L., and  
634 Nakata, P. A. *Medicago truncatula* mutants demonstrate the role of plant calcium oxalate  
635 crystals as an effective defense against chewing insects. *Plant Physiol.* 2006; 141:188–95.
- 636 43. Yoshihara, T., Sogawa, K., Pathak, M. D., Juliano, B. O., and Sakamura, S. Oxalic acid as a  
637 sucking inhibitor of the brown planthopper in rice (*Delphacidae*, homoptera). *Entomol.*  
638 *Exp. Appl.* 1980; 27:149–155.
- 639 44. Libert, B., and Franceschi, V. R. Oxalate in crop plants. *J. Agric. Food Chem.* 1987; 35:926–  
640 938.
- 641 45. Bonos, S. A., Casler, M. D., and Meyer, W. A. Inheritance of Dollar Spot Resistance in  
642 Creeping Bentgrass. *Crop Sci.* 2003; 43:2189-2196.
- 643 46. Bonos, S. A., Casler, M. D., and Meyer, W. A. Plant Responses and Characteristics  
644 Associated with Dollar Spot Resistance in Creeping Bentgrass. *Crop Sci.* 2004; 44:1763–  
645 1769.
- 646 47. Bonos, S. A. Gene Action of Dollar Spot Resistance in Creeping Bentgrass. *J. Phytopathol.*  
647 2011; 159:12–18.

- 648 48. Nelson, E. B., and Craft, C. M. Suppression of dollar spot on creeping bentgrass and annual  
649 bluegrass turf with compost-amended topdressings. *Plant Dis.* 1992; 76:954–958.
- 650 49. Goodman, D.M, and Burpee, L. L. Biological control of dollar spot. *Phytopathology.* 1991;  
651 81:1438–1446.
- 652 50. Noyes, R. D., and Hancock, J. G. Role of oxalic acid in the *Sclerotinia* wilt of sunflower.  
653 *Physiol. Plant Pathol.* 1981; 18:123–132.
- 654 51. Rietz, S., Bernsdorff, F. E. M., and Cai, D. Members of the germin-like protein family in  
655 *Brassica napus* are candidates for the initiation of an oxidative burst that impedes  
656 pathogenesis of *Sclerotinia sclerotiorum*. *J. Exp. Bot.* 2012; 63:5507–19.
- 657 52. Zhou, T., and Boland, G. J. Mycelial growth and production of oxalic acid by virulent and  
658 hypovirulent isolates of *Sclerotinia sclerotiorum*. *Can. J. Plant Pathol.* 1999; 21:93–99.
- 659 53. Bennett, A. R., and Hindal, D. Mycelial growth and oxalate production by five strains of  
660 *Cryphonectria parasitica* in selected liquid culture media. *Mycologia.* 1989; 81:554–560.

## 661 **Supporting Information**

662 **S1 Table.** Plants used in this research.

663 **S2 Table.** Fungal isolates used in this research.

664 **S3 Table.** Symptom severity rating scale used for *Clariireedia* spp. infection of creeping bentgrass  
665 and models hosts.

666 **S4 Table.** Primers used for RT-qPCR expression analysis of creeping bentgrass GLP genes.

667 **S1 Figure. Methods used for inoculation of various hosts with *Clariireedia* spp.** **A)** Inoculation  
668 of *Arabidopsis thaliana* leaves with single agar plugs placed mycelia-side down on leaf surfaces.  
669 Inoculated plants were covered with a humidity dome to maintain high relative humidity. **B)**  
670 *Brachypodium distachyon* plants were inoculated by placing an agar plug colonized with  
671 *Clariireedia* sp. mycelium-side down against foliar material and wrapping with parafilm. **C)** Pots  
672 of creeping bentgrass were inoculated by collecting leaf blades in the center of the pot into a bundle  
673 and placing a single agar plug against the foliar tissue, then wrapping with parafilm. **D)** The most  
674 recent fully expanded leaf of barley, rice, and wheat plant were inoculated by placing a single agar  
675 plug colonized with *Clariireedia* sp. mycelia side down on the adaxial side of the leaf, then  
676 wrapping with parafilm. Mock-inoculations were performed similarly for all species but  
677 *Clariireedia* sp. colonized plugs were replaced with fresh PDA plugs.

678 **S2 Figure. Oxalic acid production by *Clariireedia* sp. isolates.** Oxalic acid production was  
679 measured *in vitro* using bromophenol blue amended medium, which changes from purple to yellow  
680 in color as a result of medium acidification. The area of color change was measured by averaging  
681 two perpendicular contrasts across the yellow areas. When areas of color change were diffuse, all  
682 were measured and the average measurements were combined. Columns represent the pooled  
683 means from three experimental repetitions with three replicates per isolate in each repetition (n=9).

684 Error bars represent  $\pm$  one standard error of the mean. A1623 (red), ML75 (green), and HE10G14  
685 (blue) were selected as isolates with high, moderate, and low oxalic acid production capacities,  
686 respectively.

687 **S3 Figure. Selection of candidate oxalate oxidase and germin-like protein genes. A)** CRB  
688 (AST) and representative barley (HvGer) and rice (Os) GLP amino acid sequences from rice and  
689 barley were aligned using ClustalW. JalView was used to color sequence alignment according to  
690 percent identity. Key features of GLP genes are annotated with green boxes and black text. Blue  
691 arrowheads mark the start and end of the GLP cupin domain. ‘AST’ nucleotide sequences were  
692 originally identified by Orshinsky et al. 2012. **B)** Maximum parsimony phylogenetic tree (100  
693 bootstraps with sequence order re-arranging over 10 data sets) of CRB and select grass GLP- genes.  
694 The percentage of replicate trees in which the associated taxa clustered together in the bootstrap  
695 test are shown next to the branches. Rice and barley defense-associated GLP genes are indicated  
696 by the green box. Oxalate oxidase-type CRB GLP-genes are indicated by the orange box. RT-  
697 qPCR analysis of expression was performed for creeping bentgrass genes marked by an asterisk.  
698 **C)** Time-course expression analysis for creeping bentgrass GLP-genes AST\_590 and AST\_608.  
699 Both genes were significantly up-regulated in the *Clariireedia sp.*-inoculated susceptible cultivar  
700 relative to the *Clariireedia sp.*-inoculated resistant cultivar and mock-inoculated susceptible  
701 cultivar at 72 hpi ( $P < 0.05$ ). At 96 hpi, both genes were upregulated in the *Clariireedia sp.*-  
702 inoculated susceptible and resistant cultivars relative to the mock-inoculated controls for each  
703 cultivar ( $P < 0.05$ ). There was no difference in expression of either gene between the *Clariireedia*  
704 *sp.*-inoculated susceptible and resistant cultivars at 96 hpi ( $P > 0.10$ ).



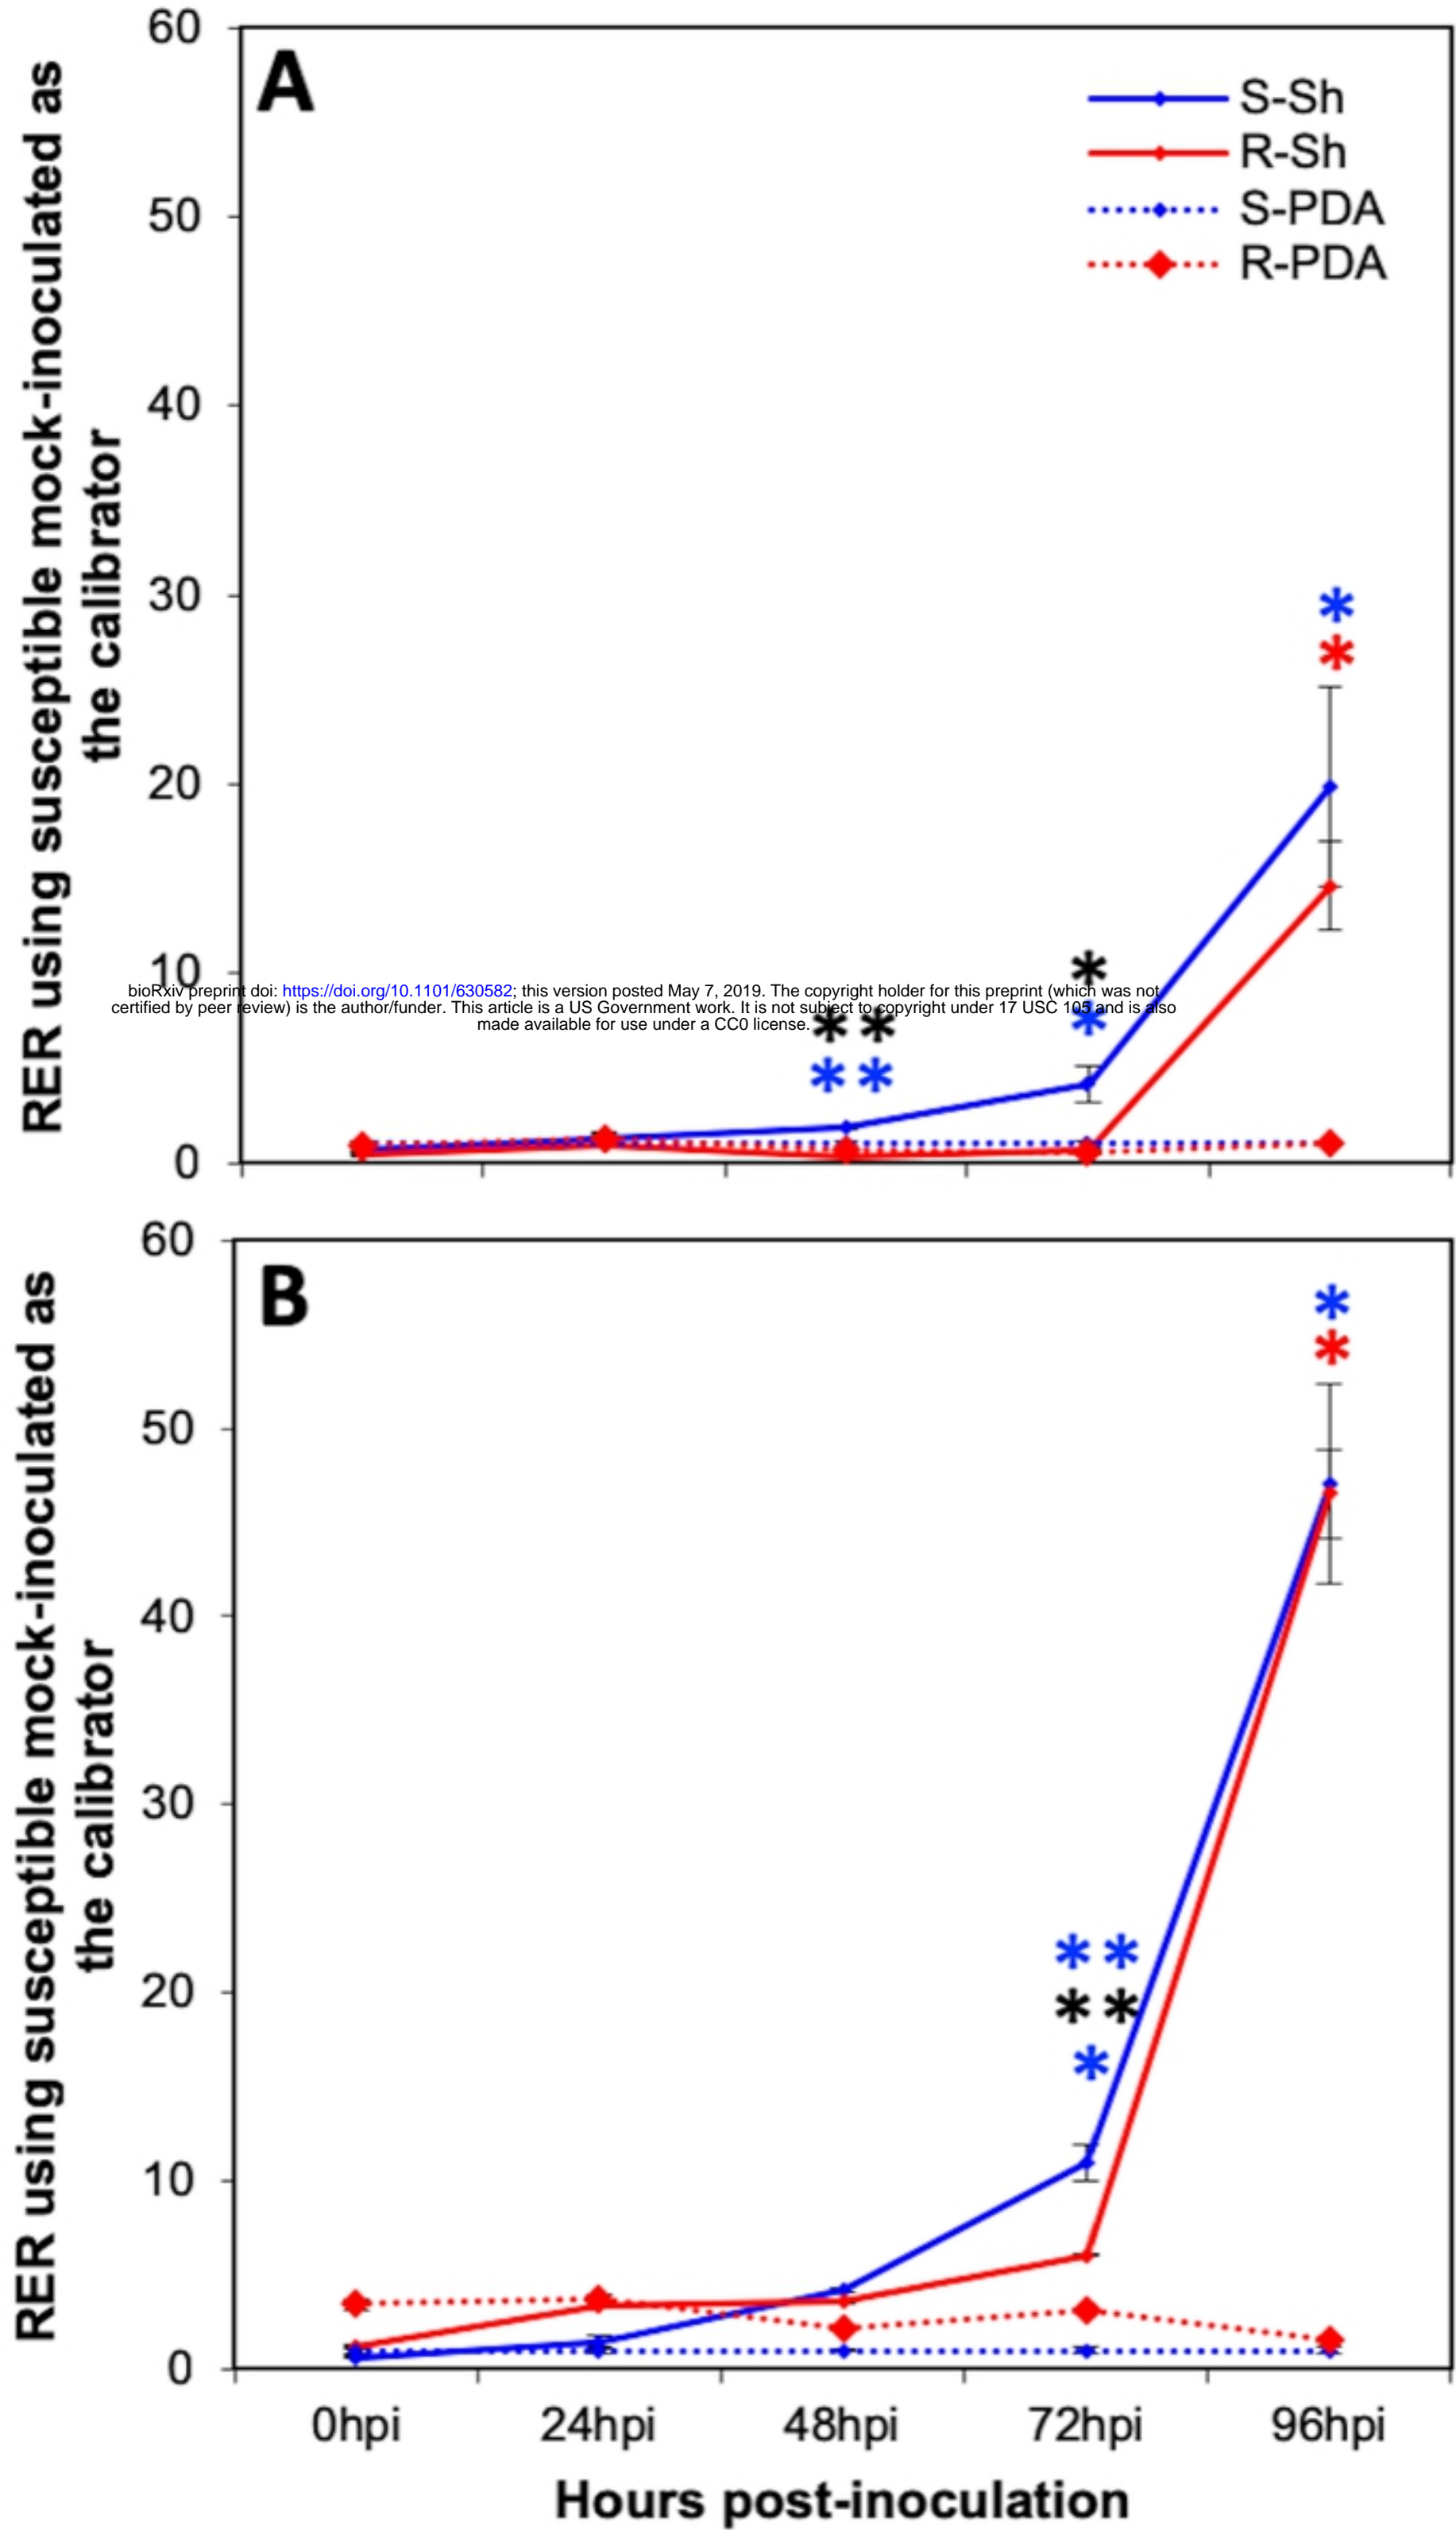

Figure 7



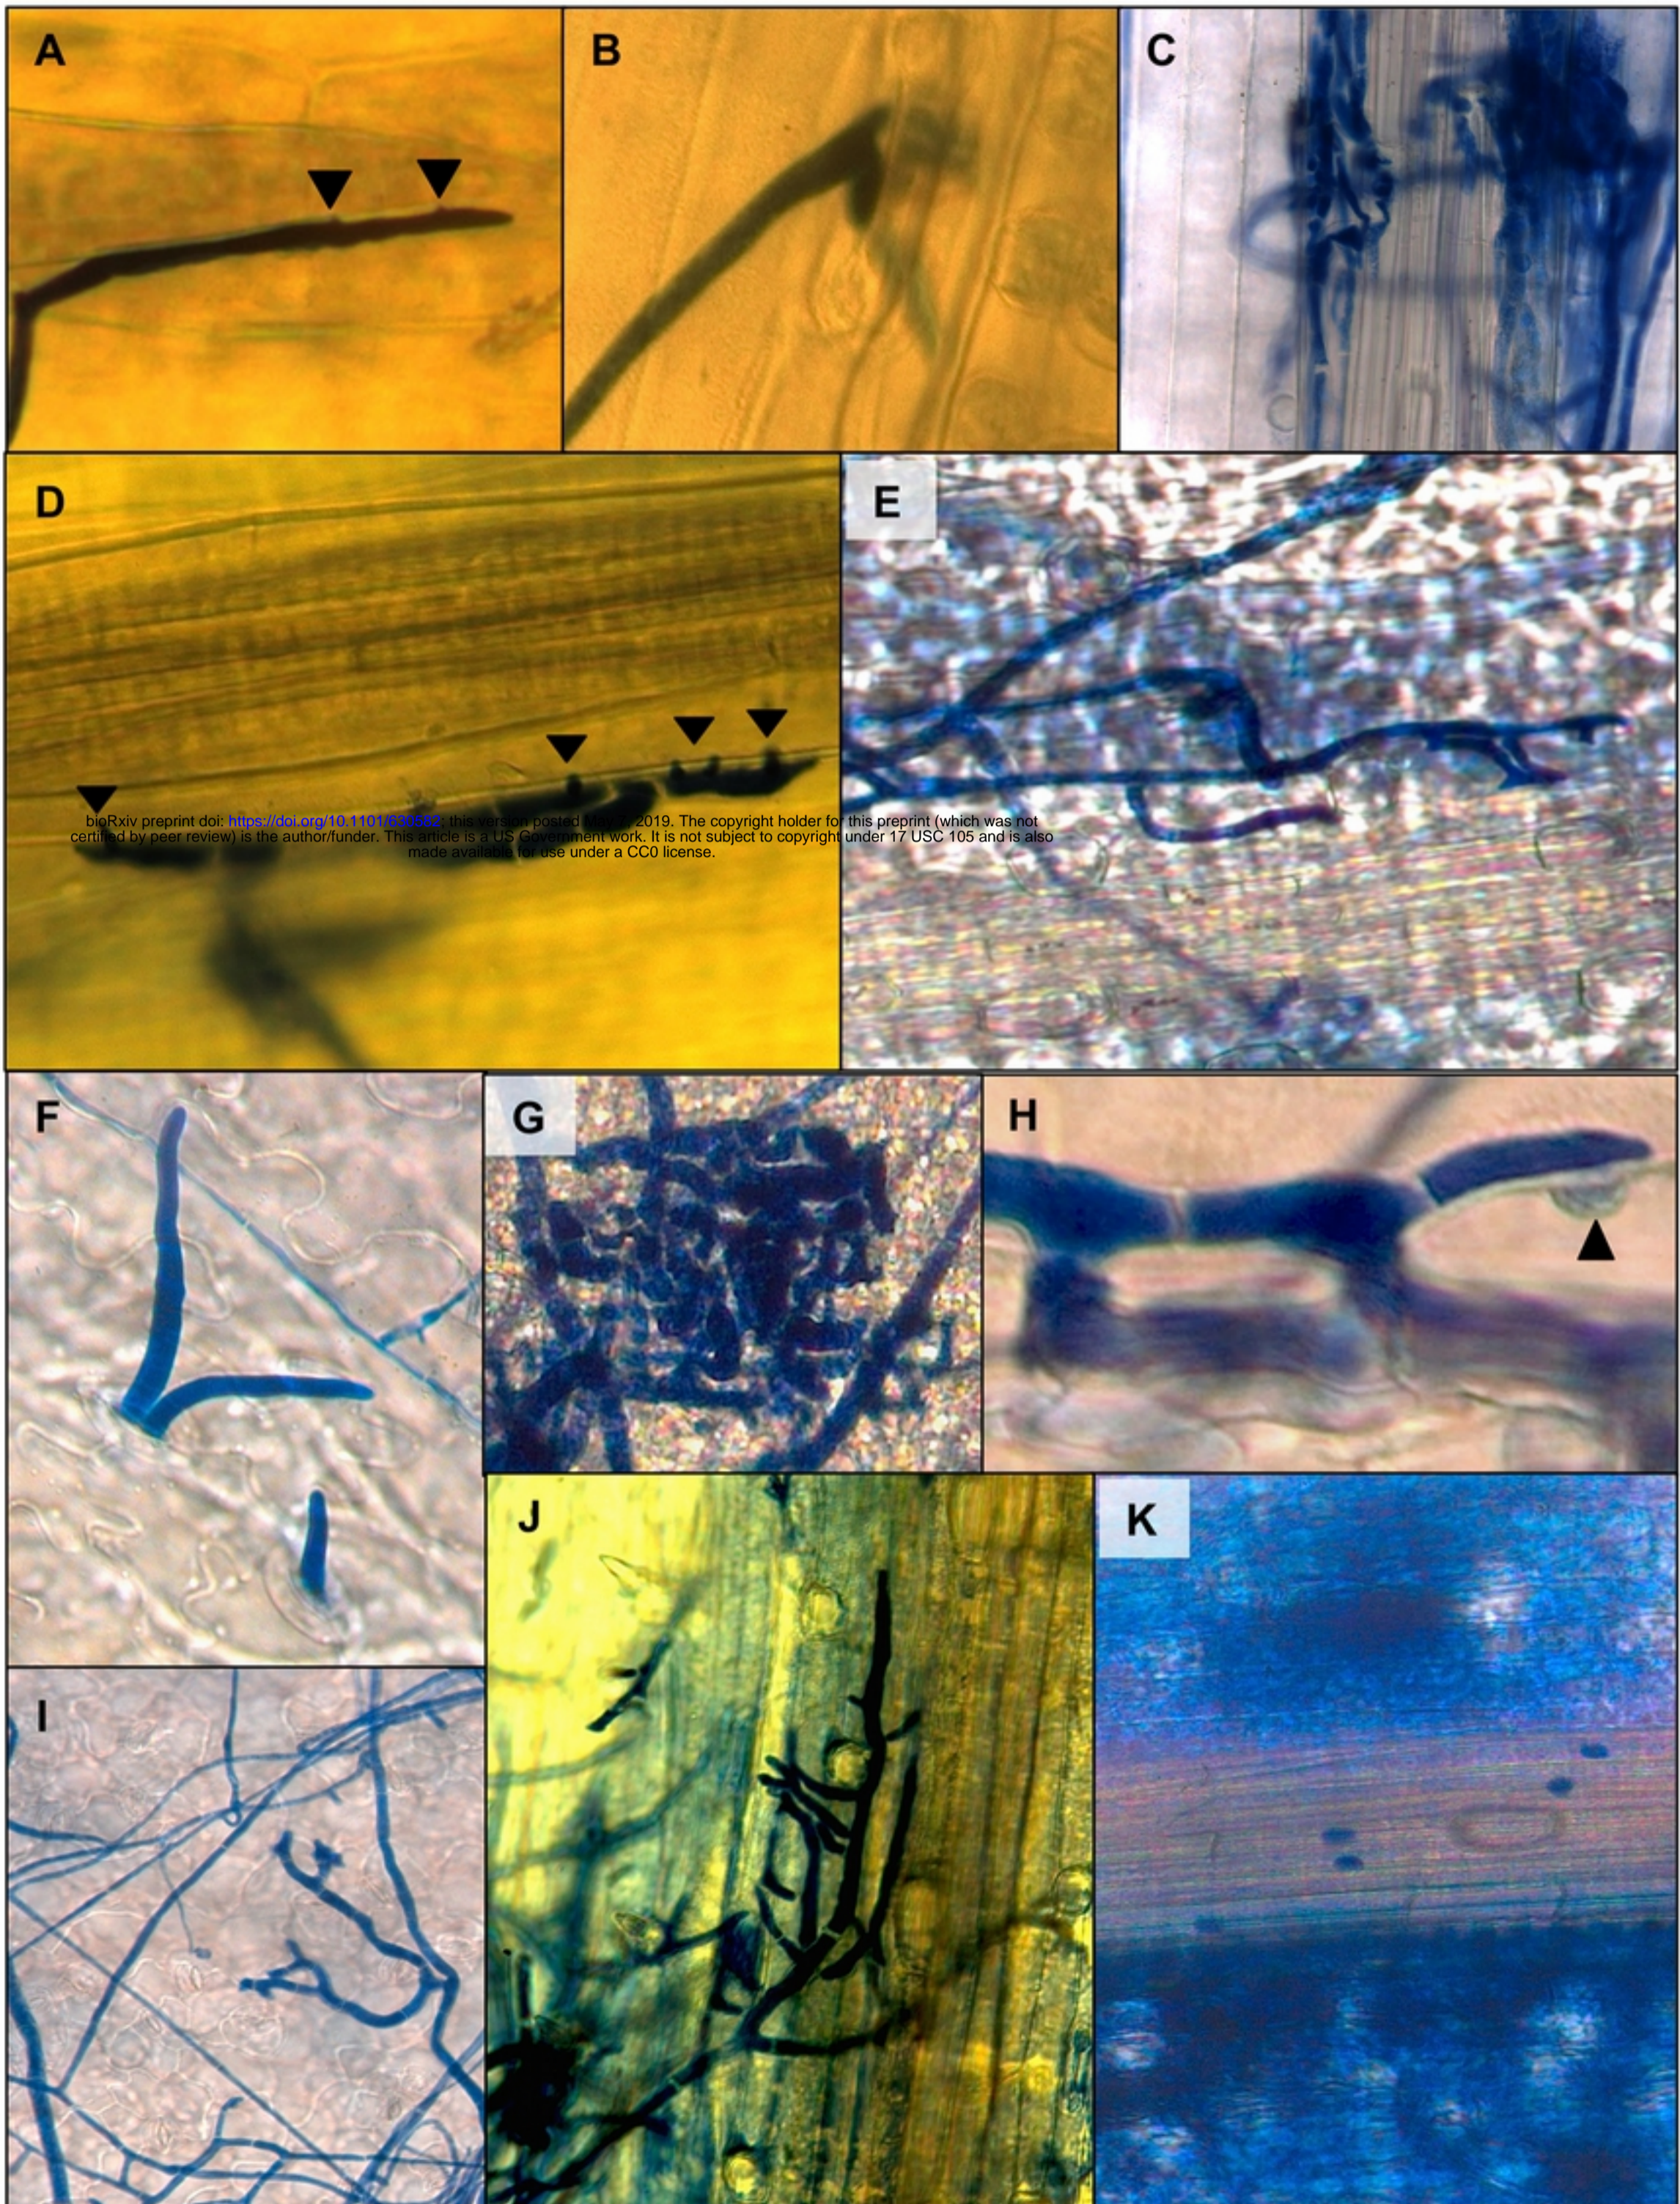

Figure 1



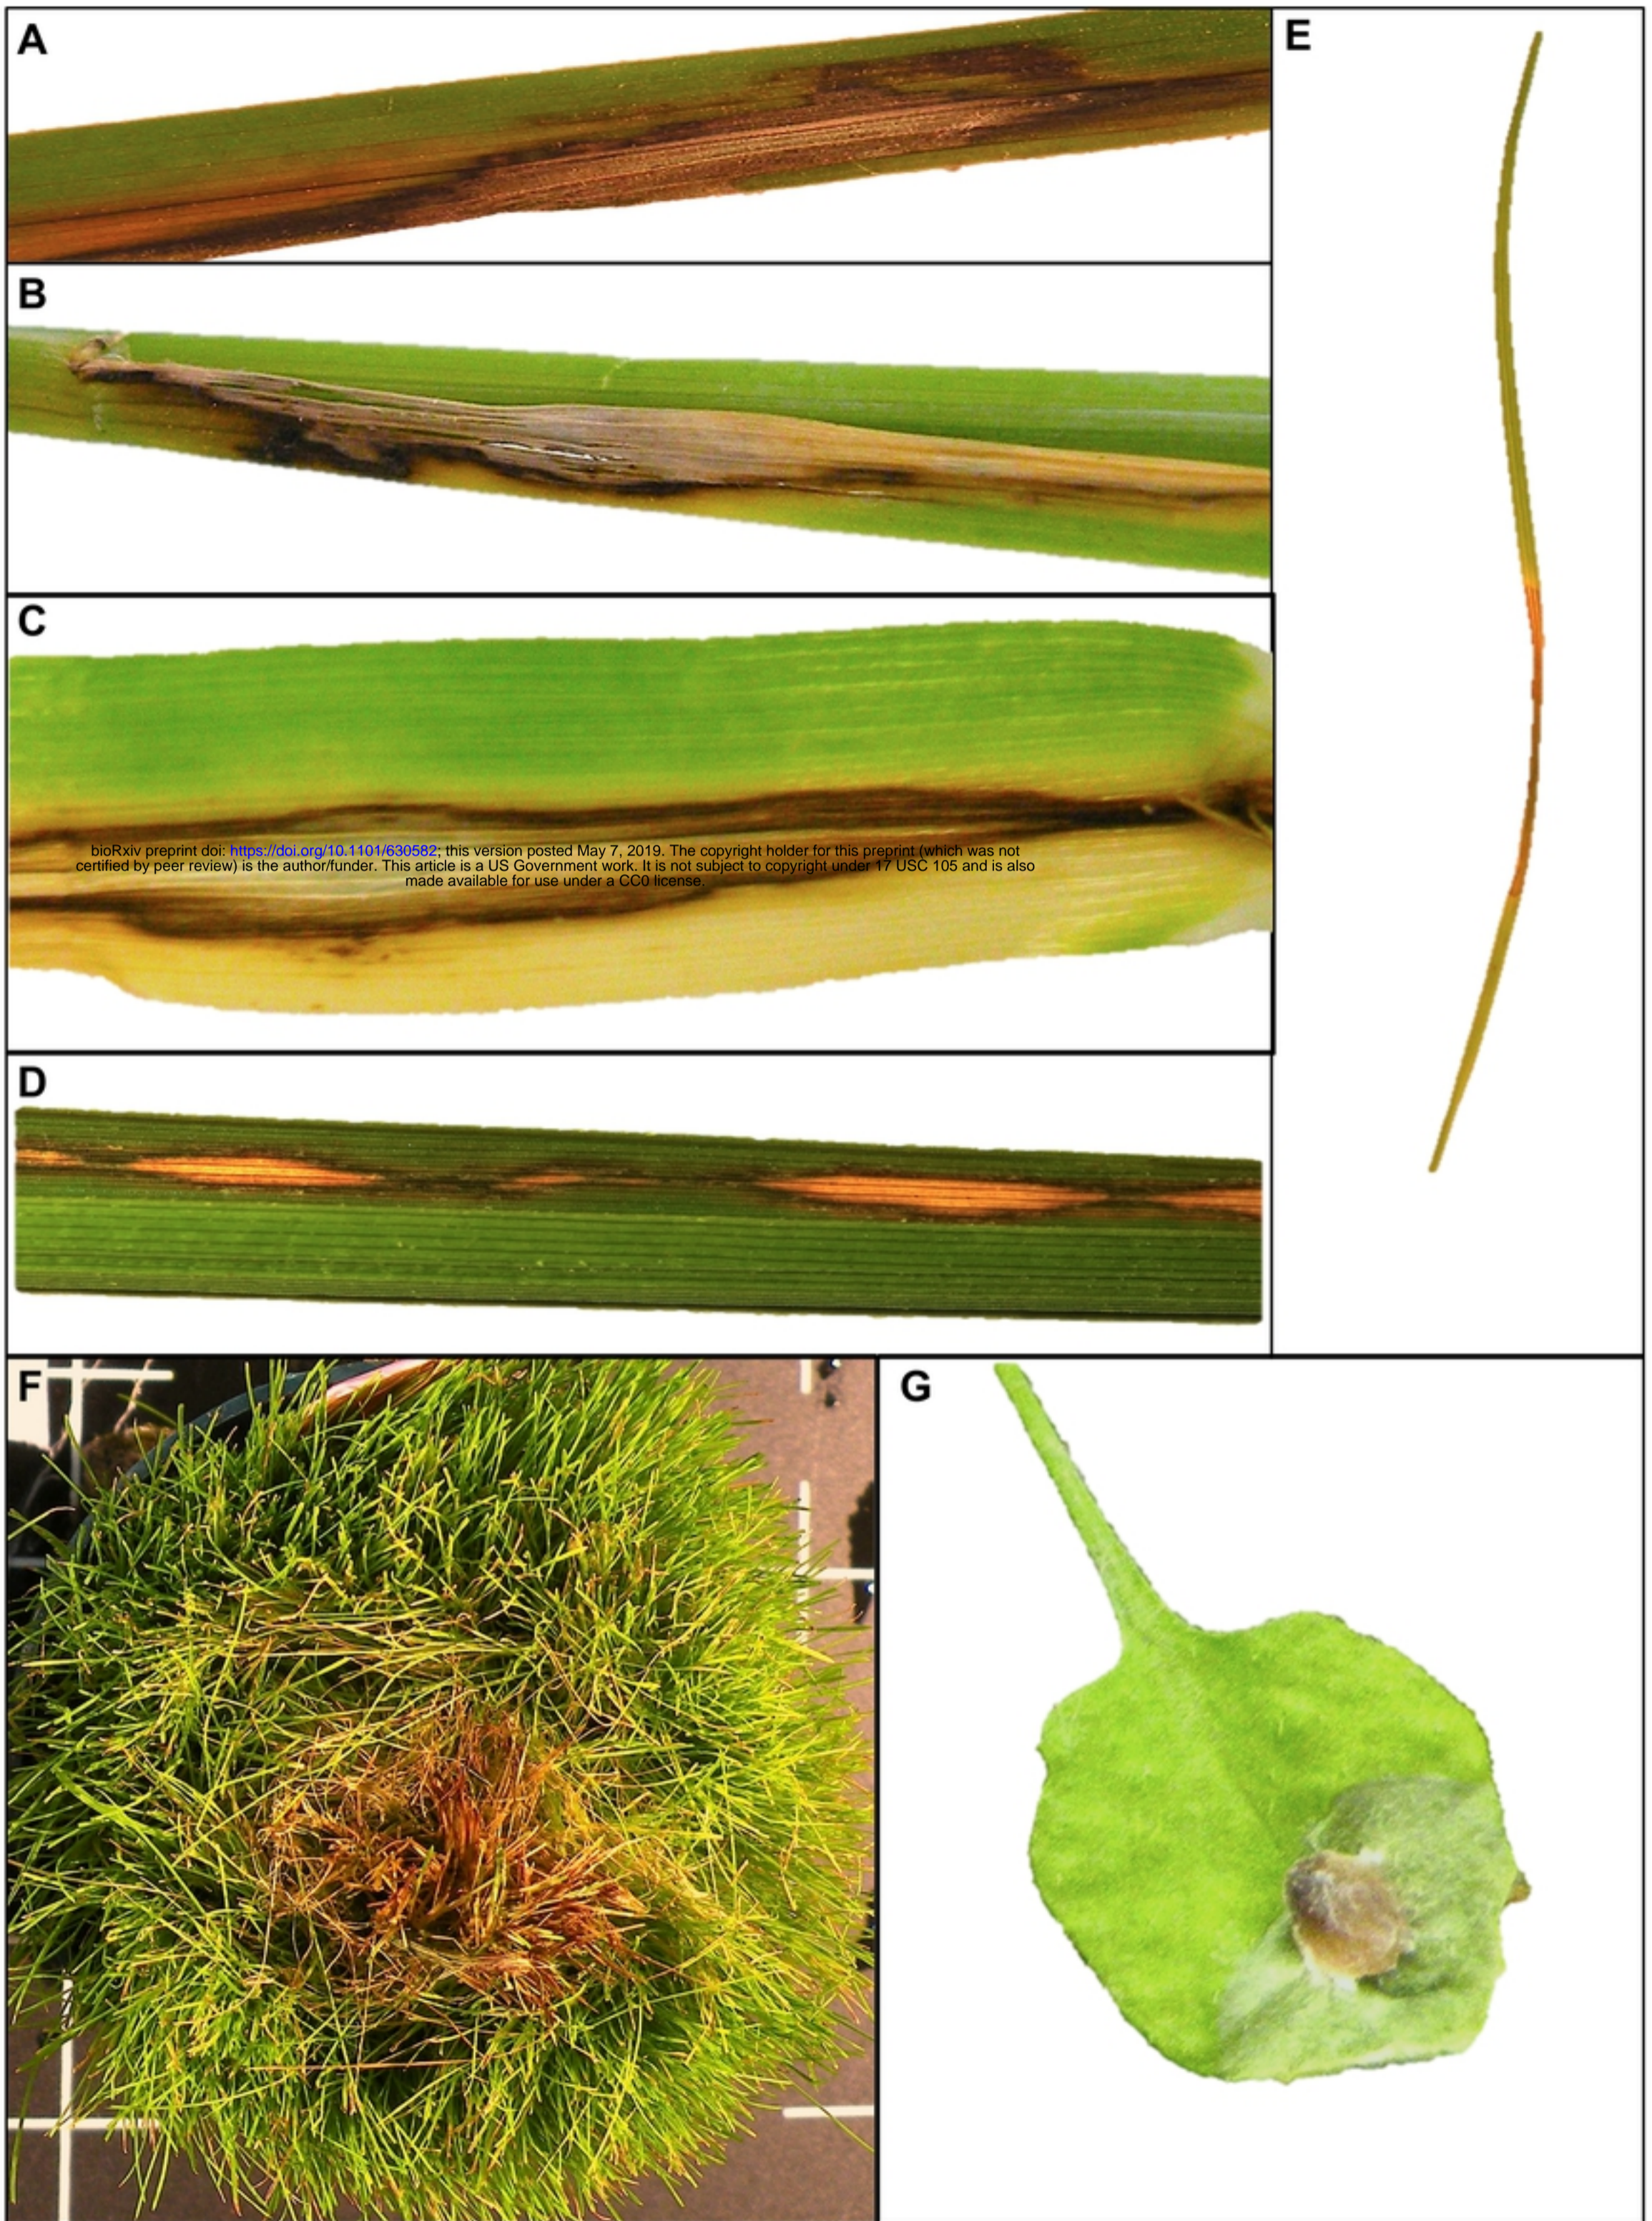

Figure 2



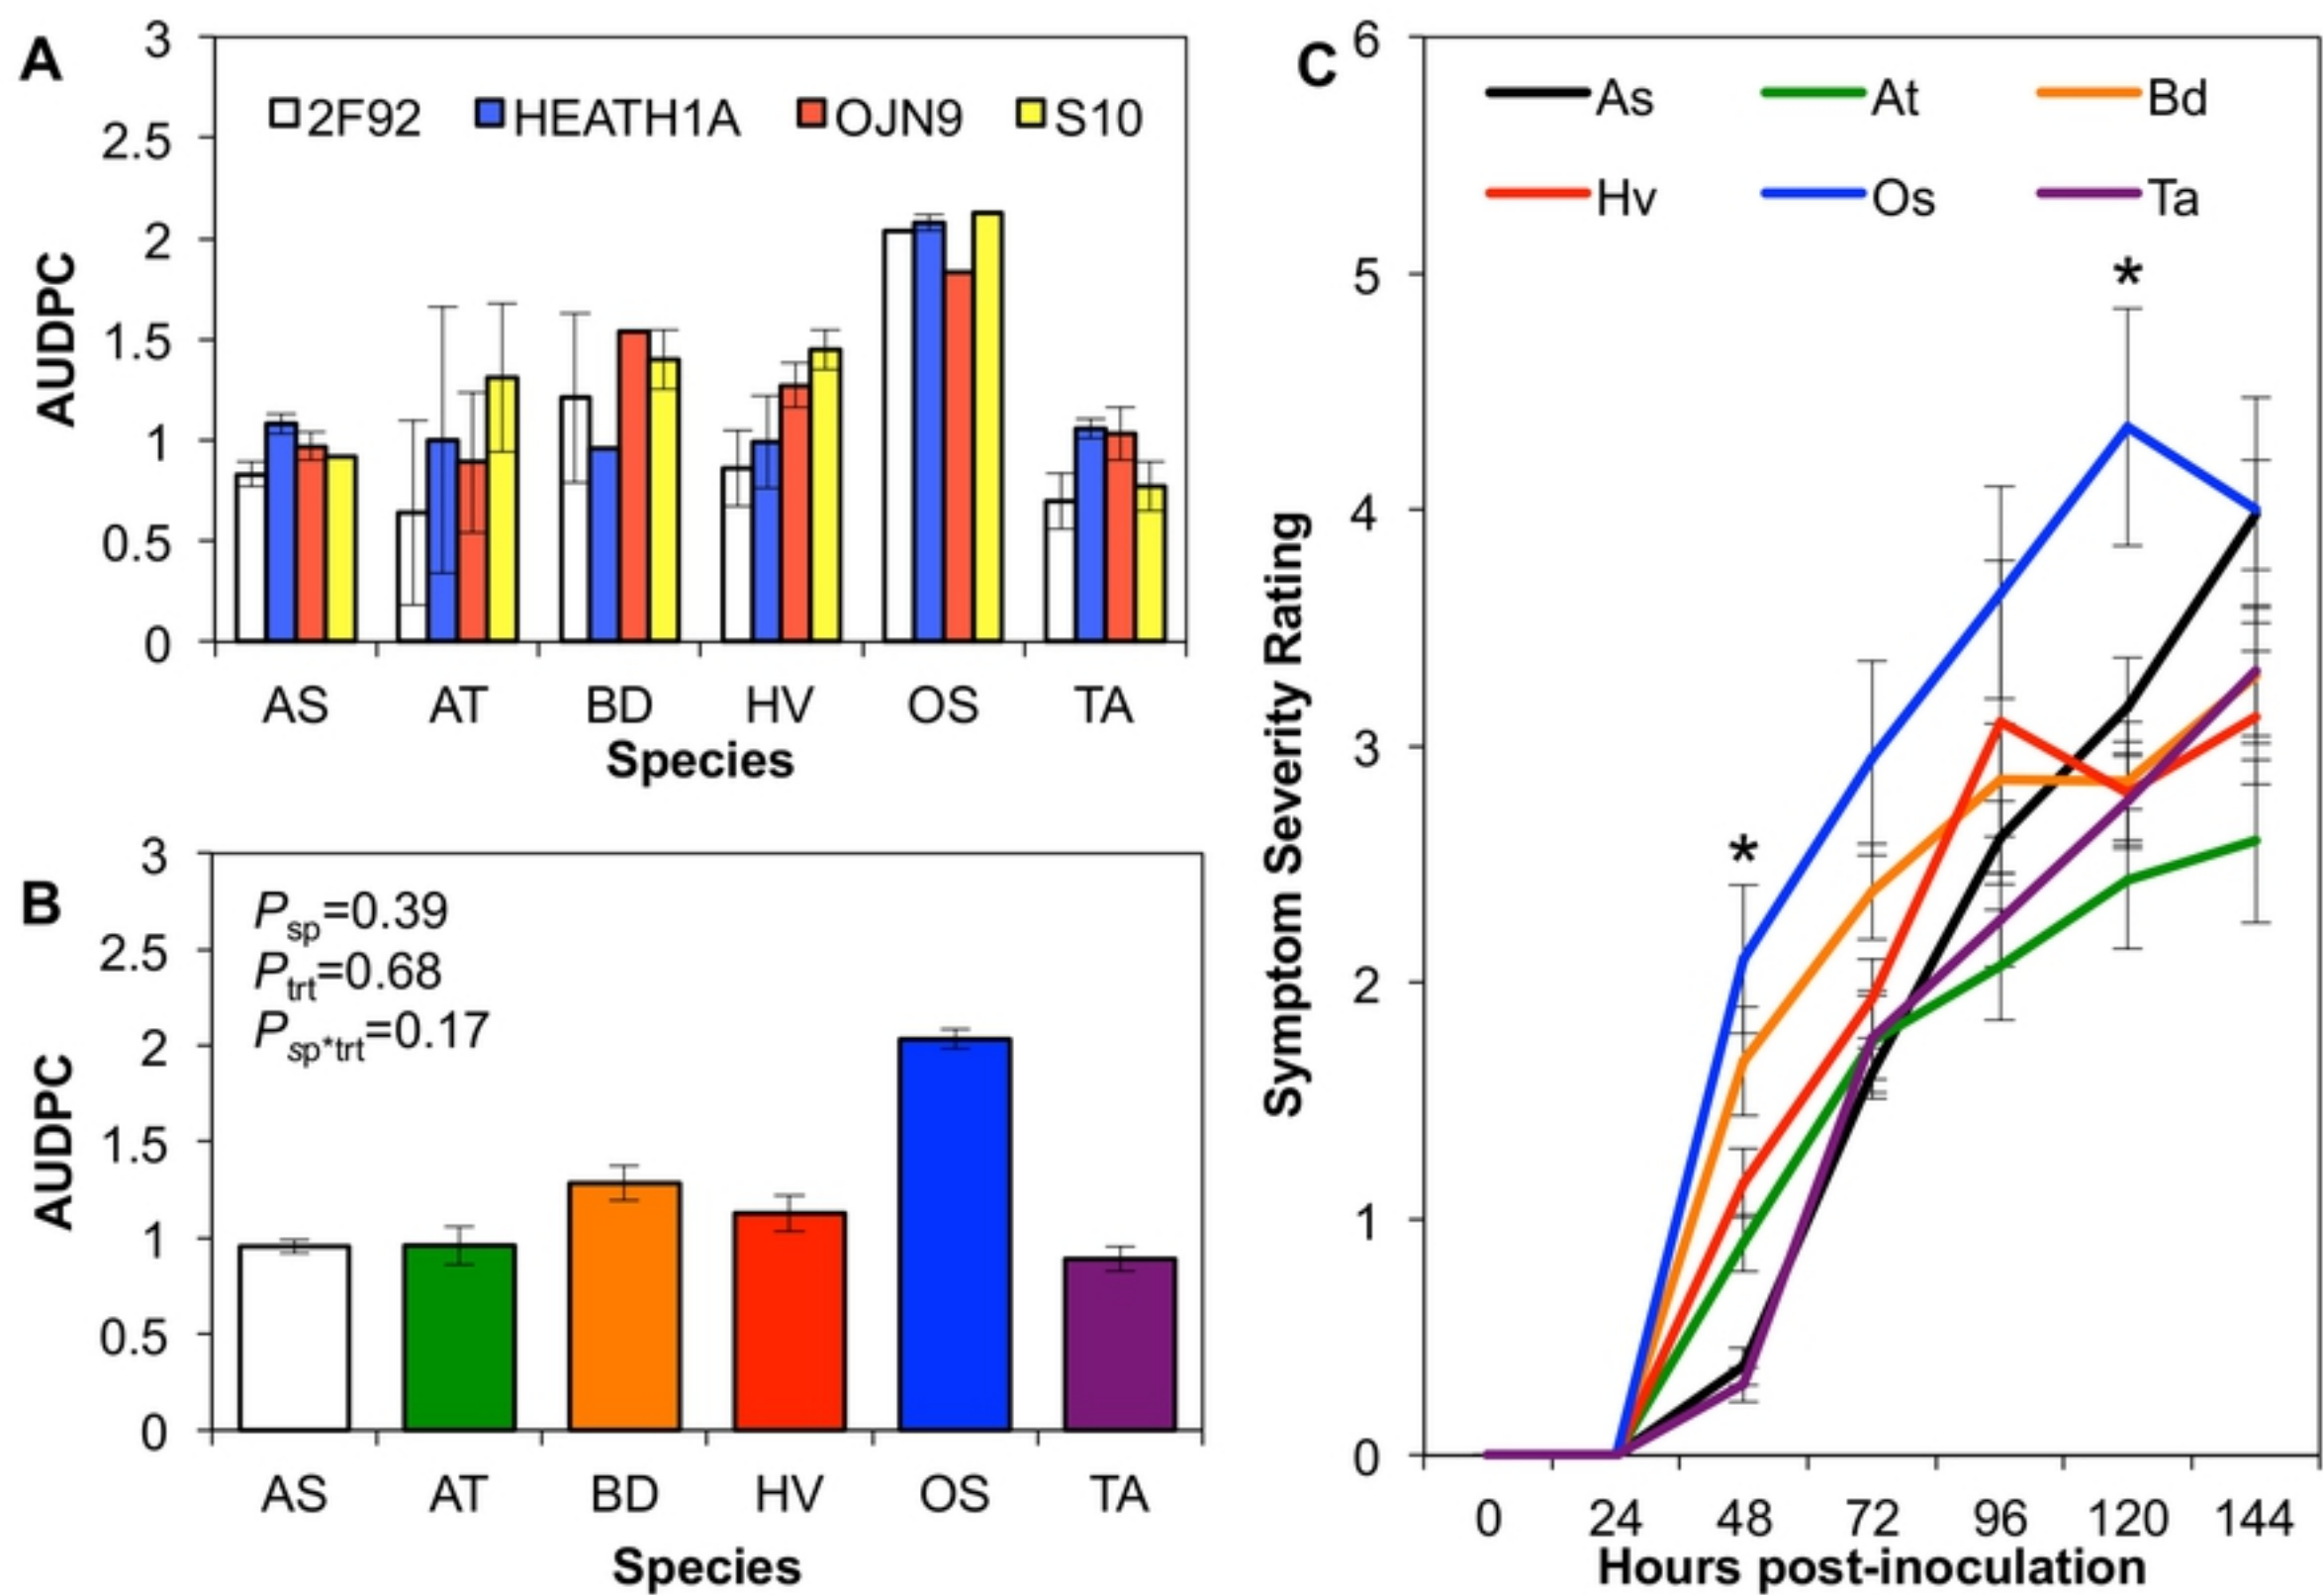

Figure 3

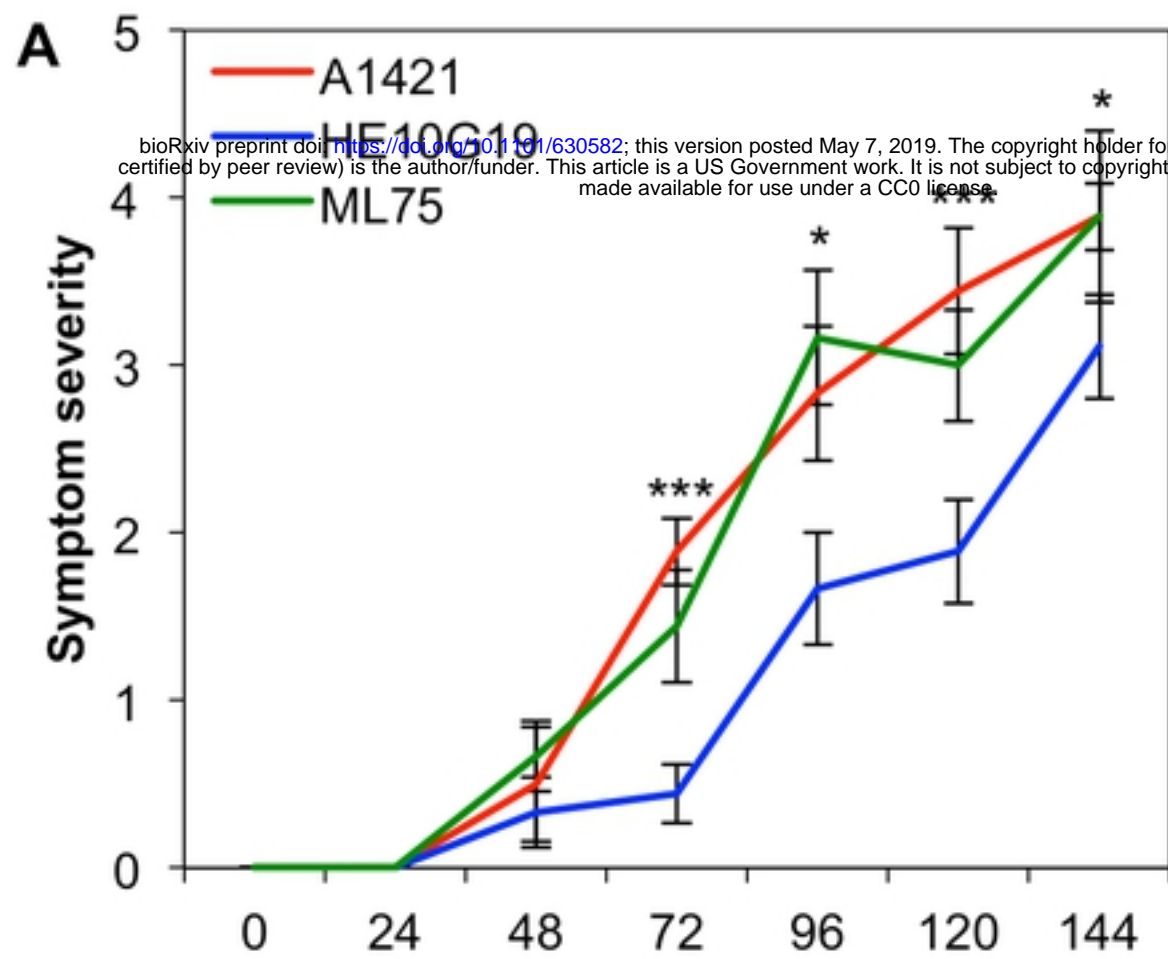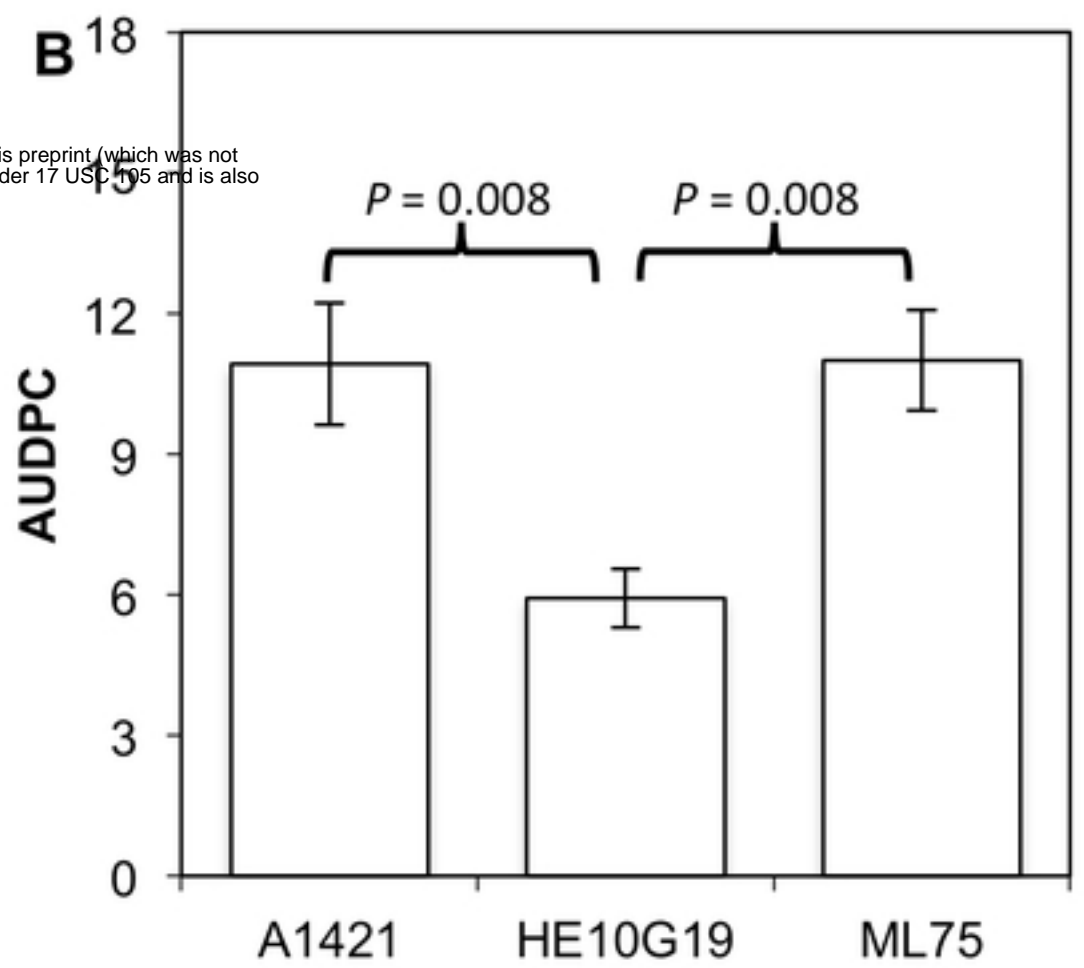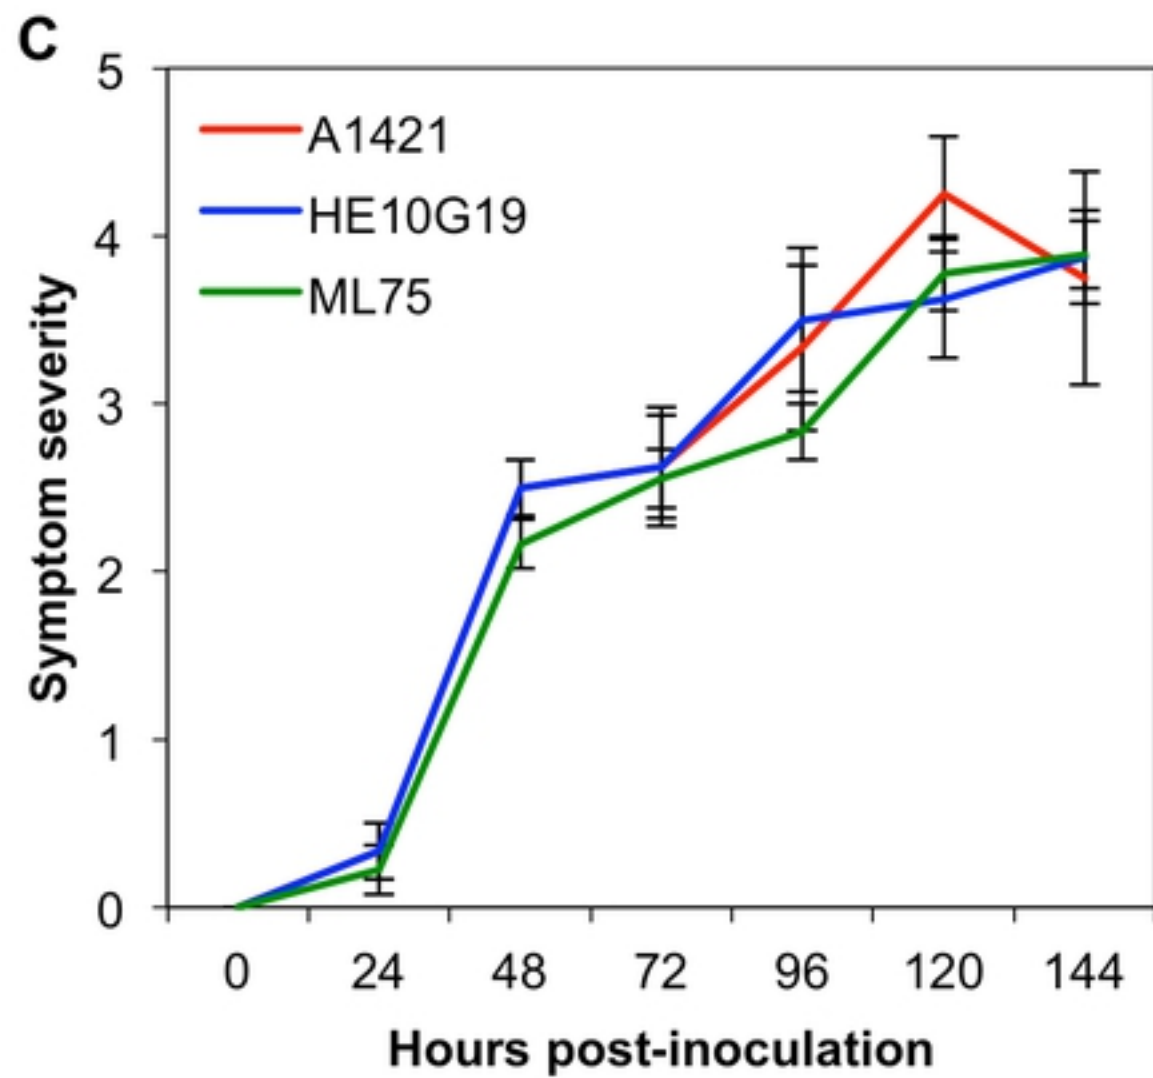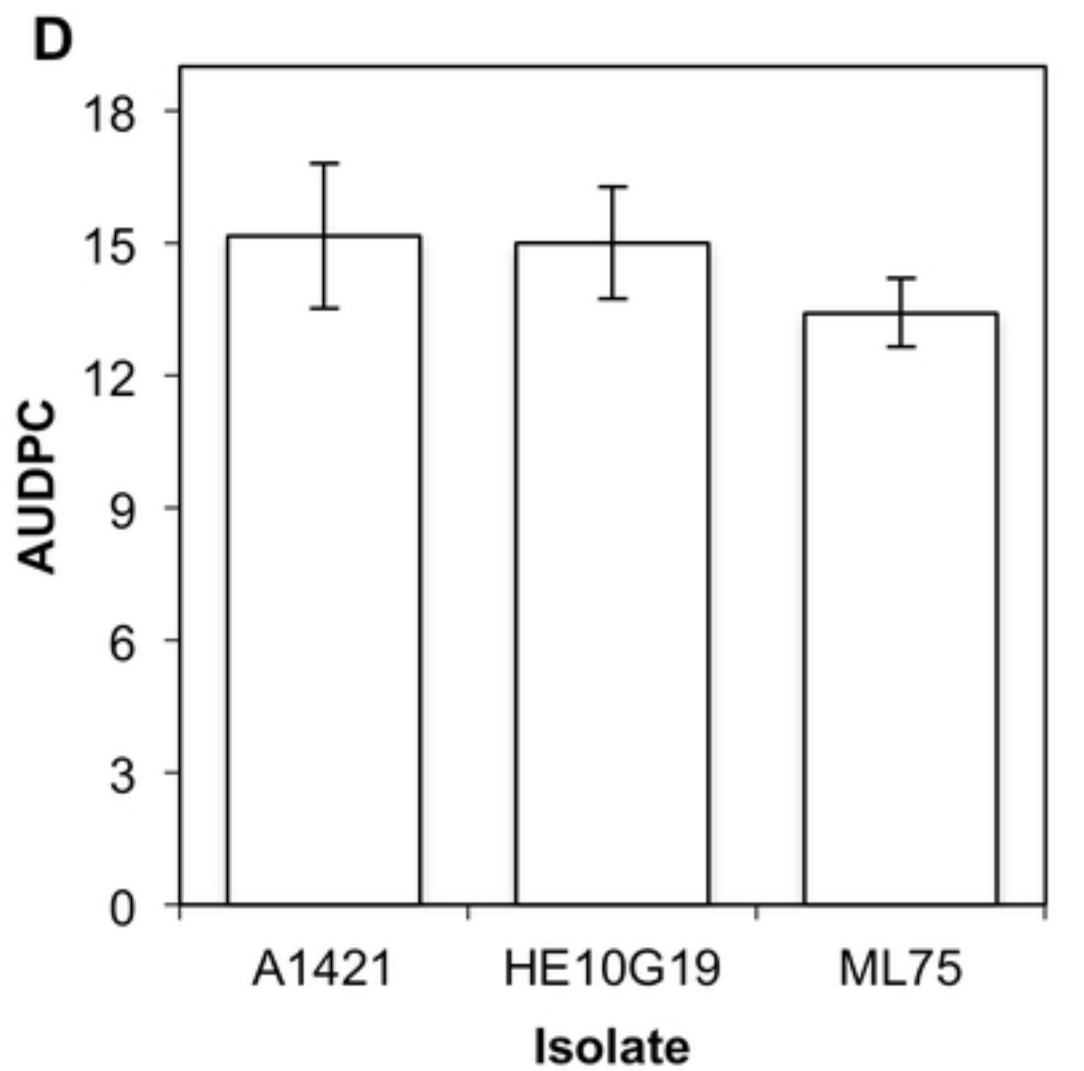

Figure 6

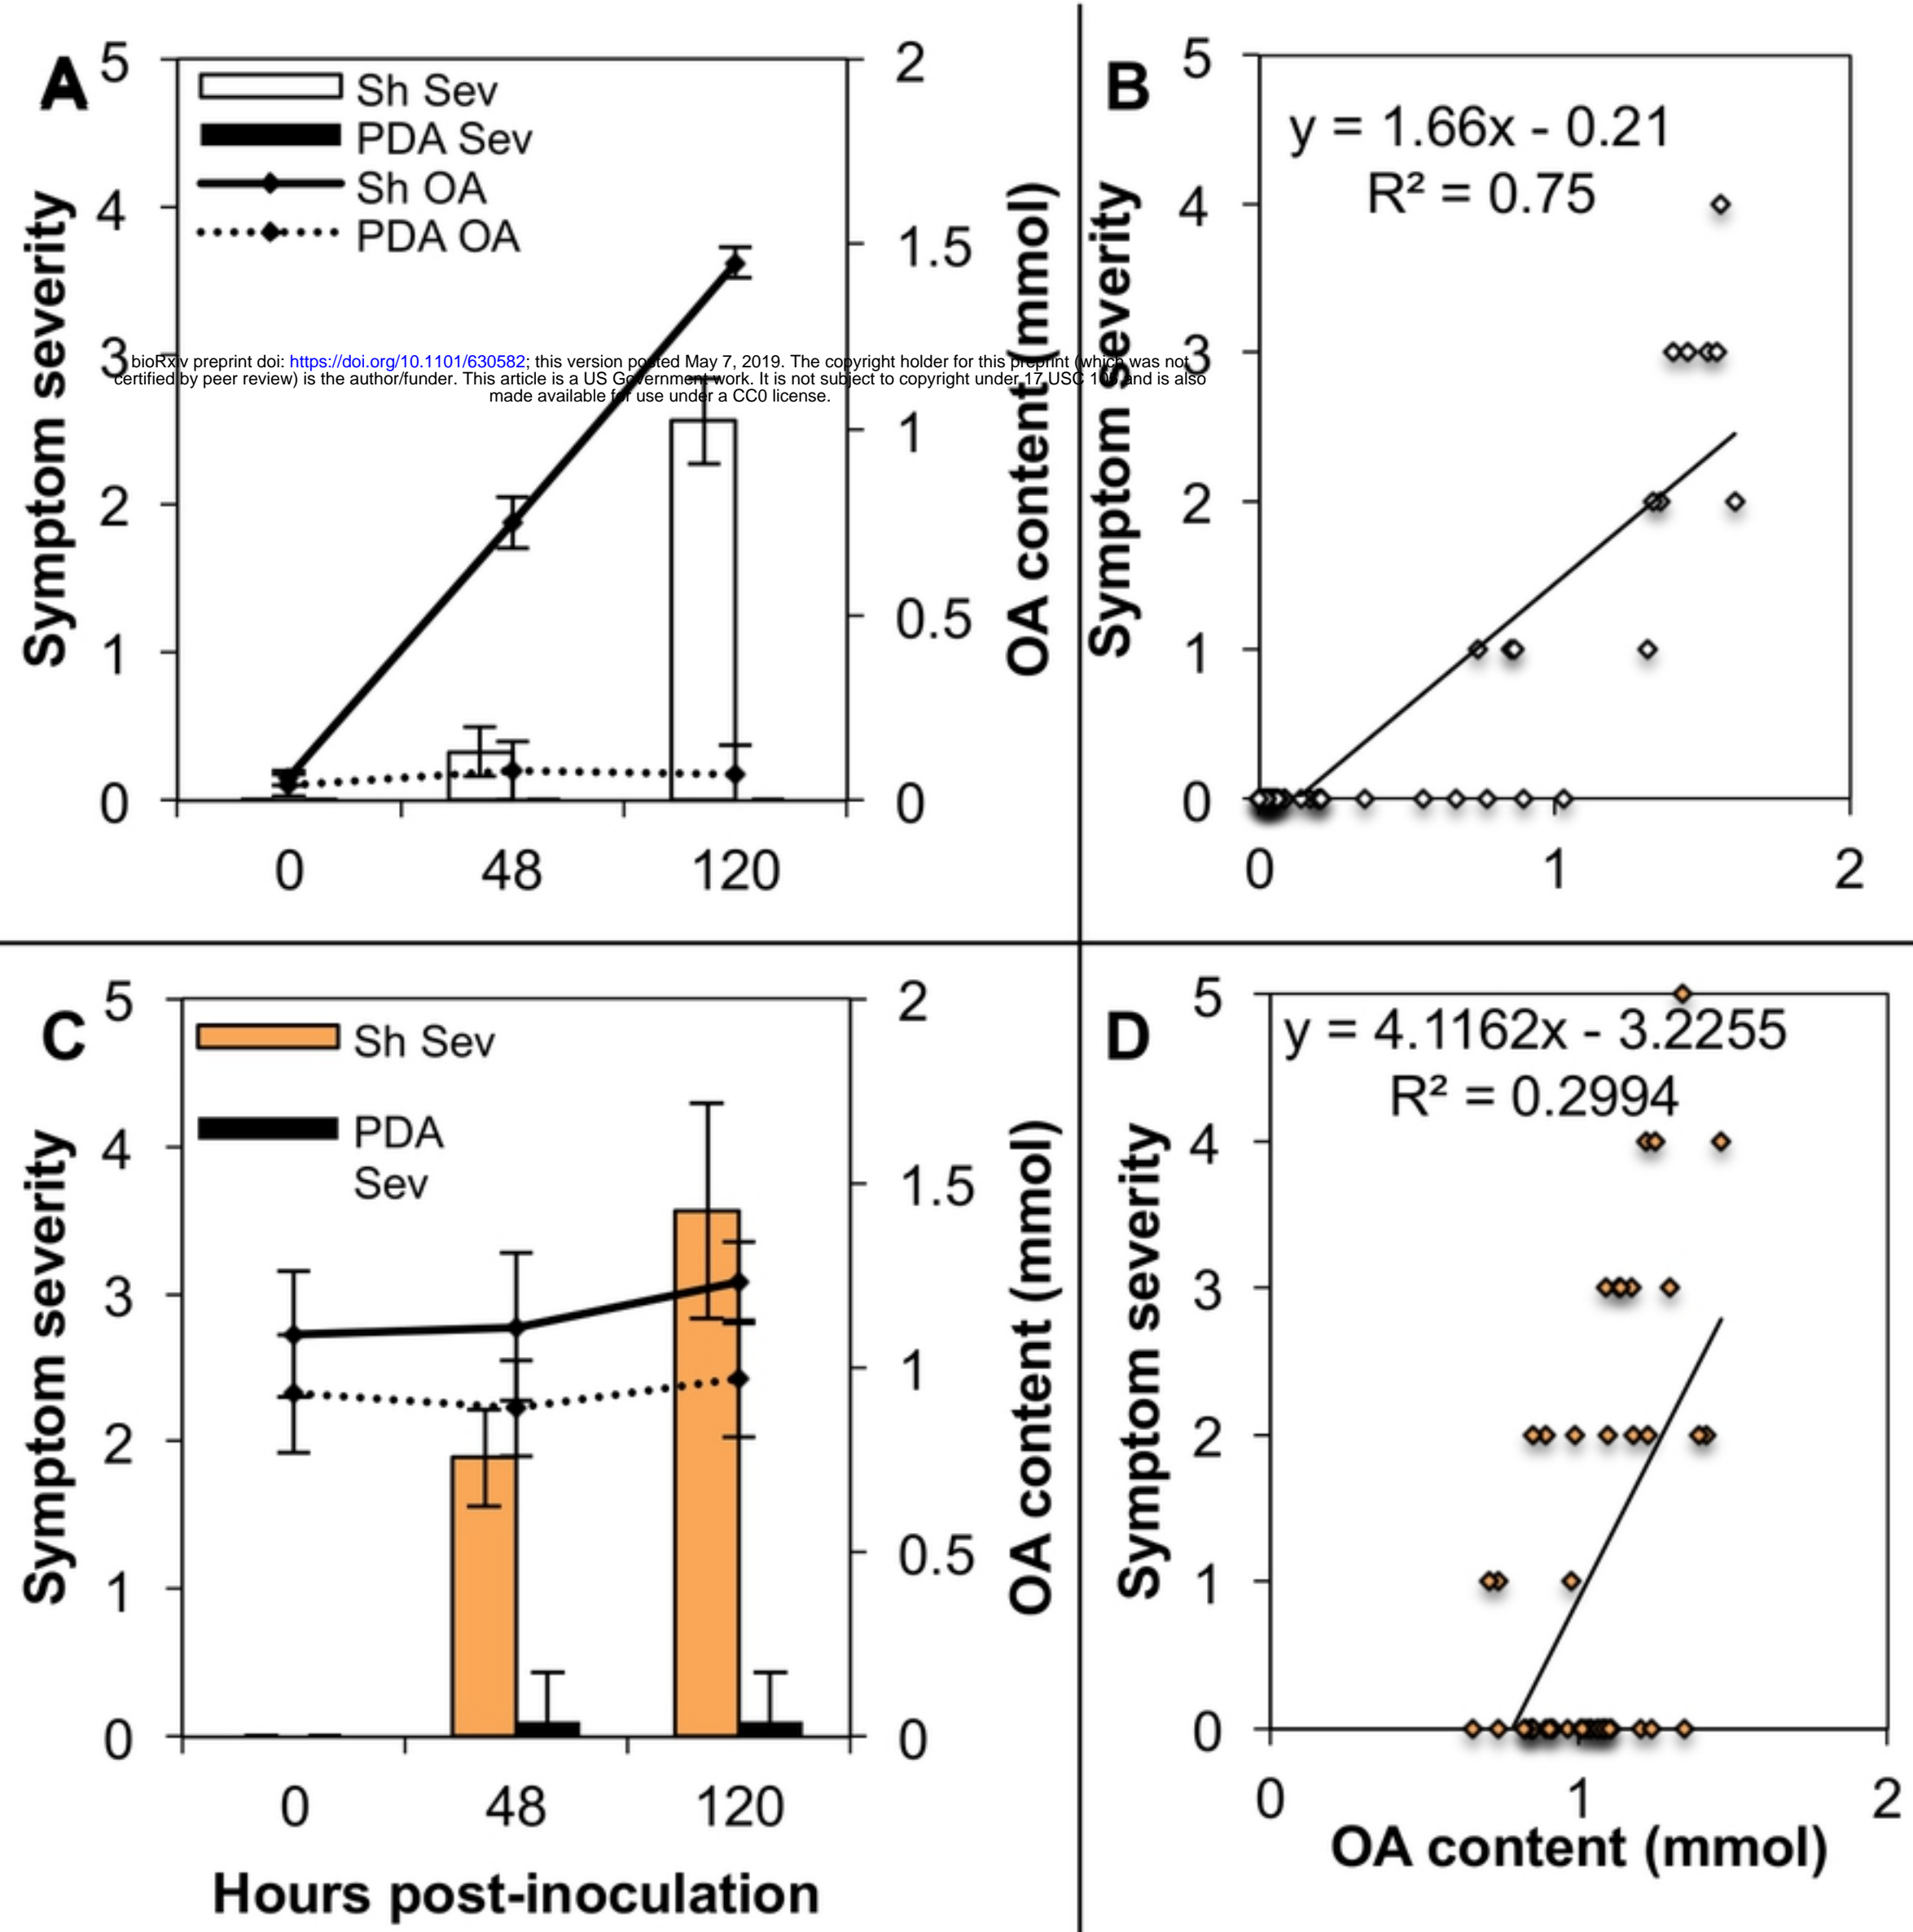

Figure 5

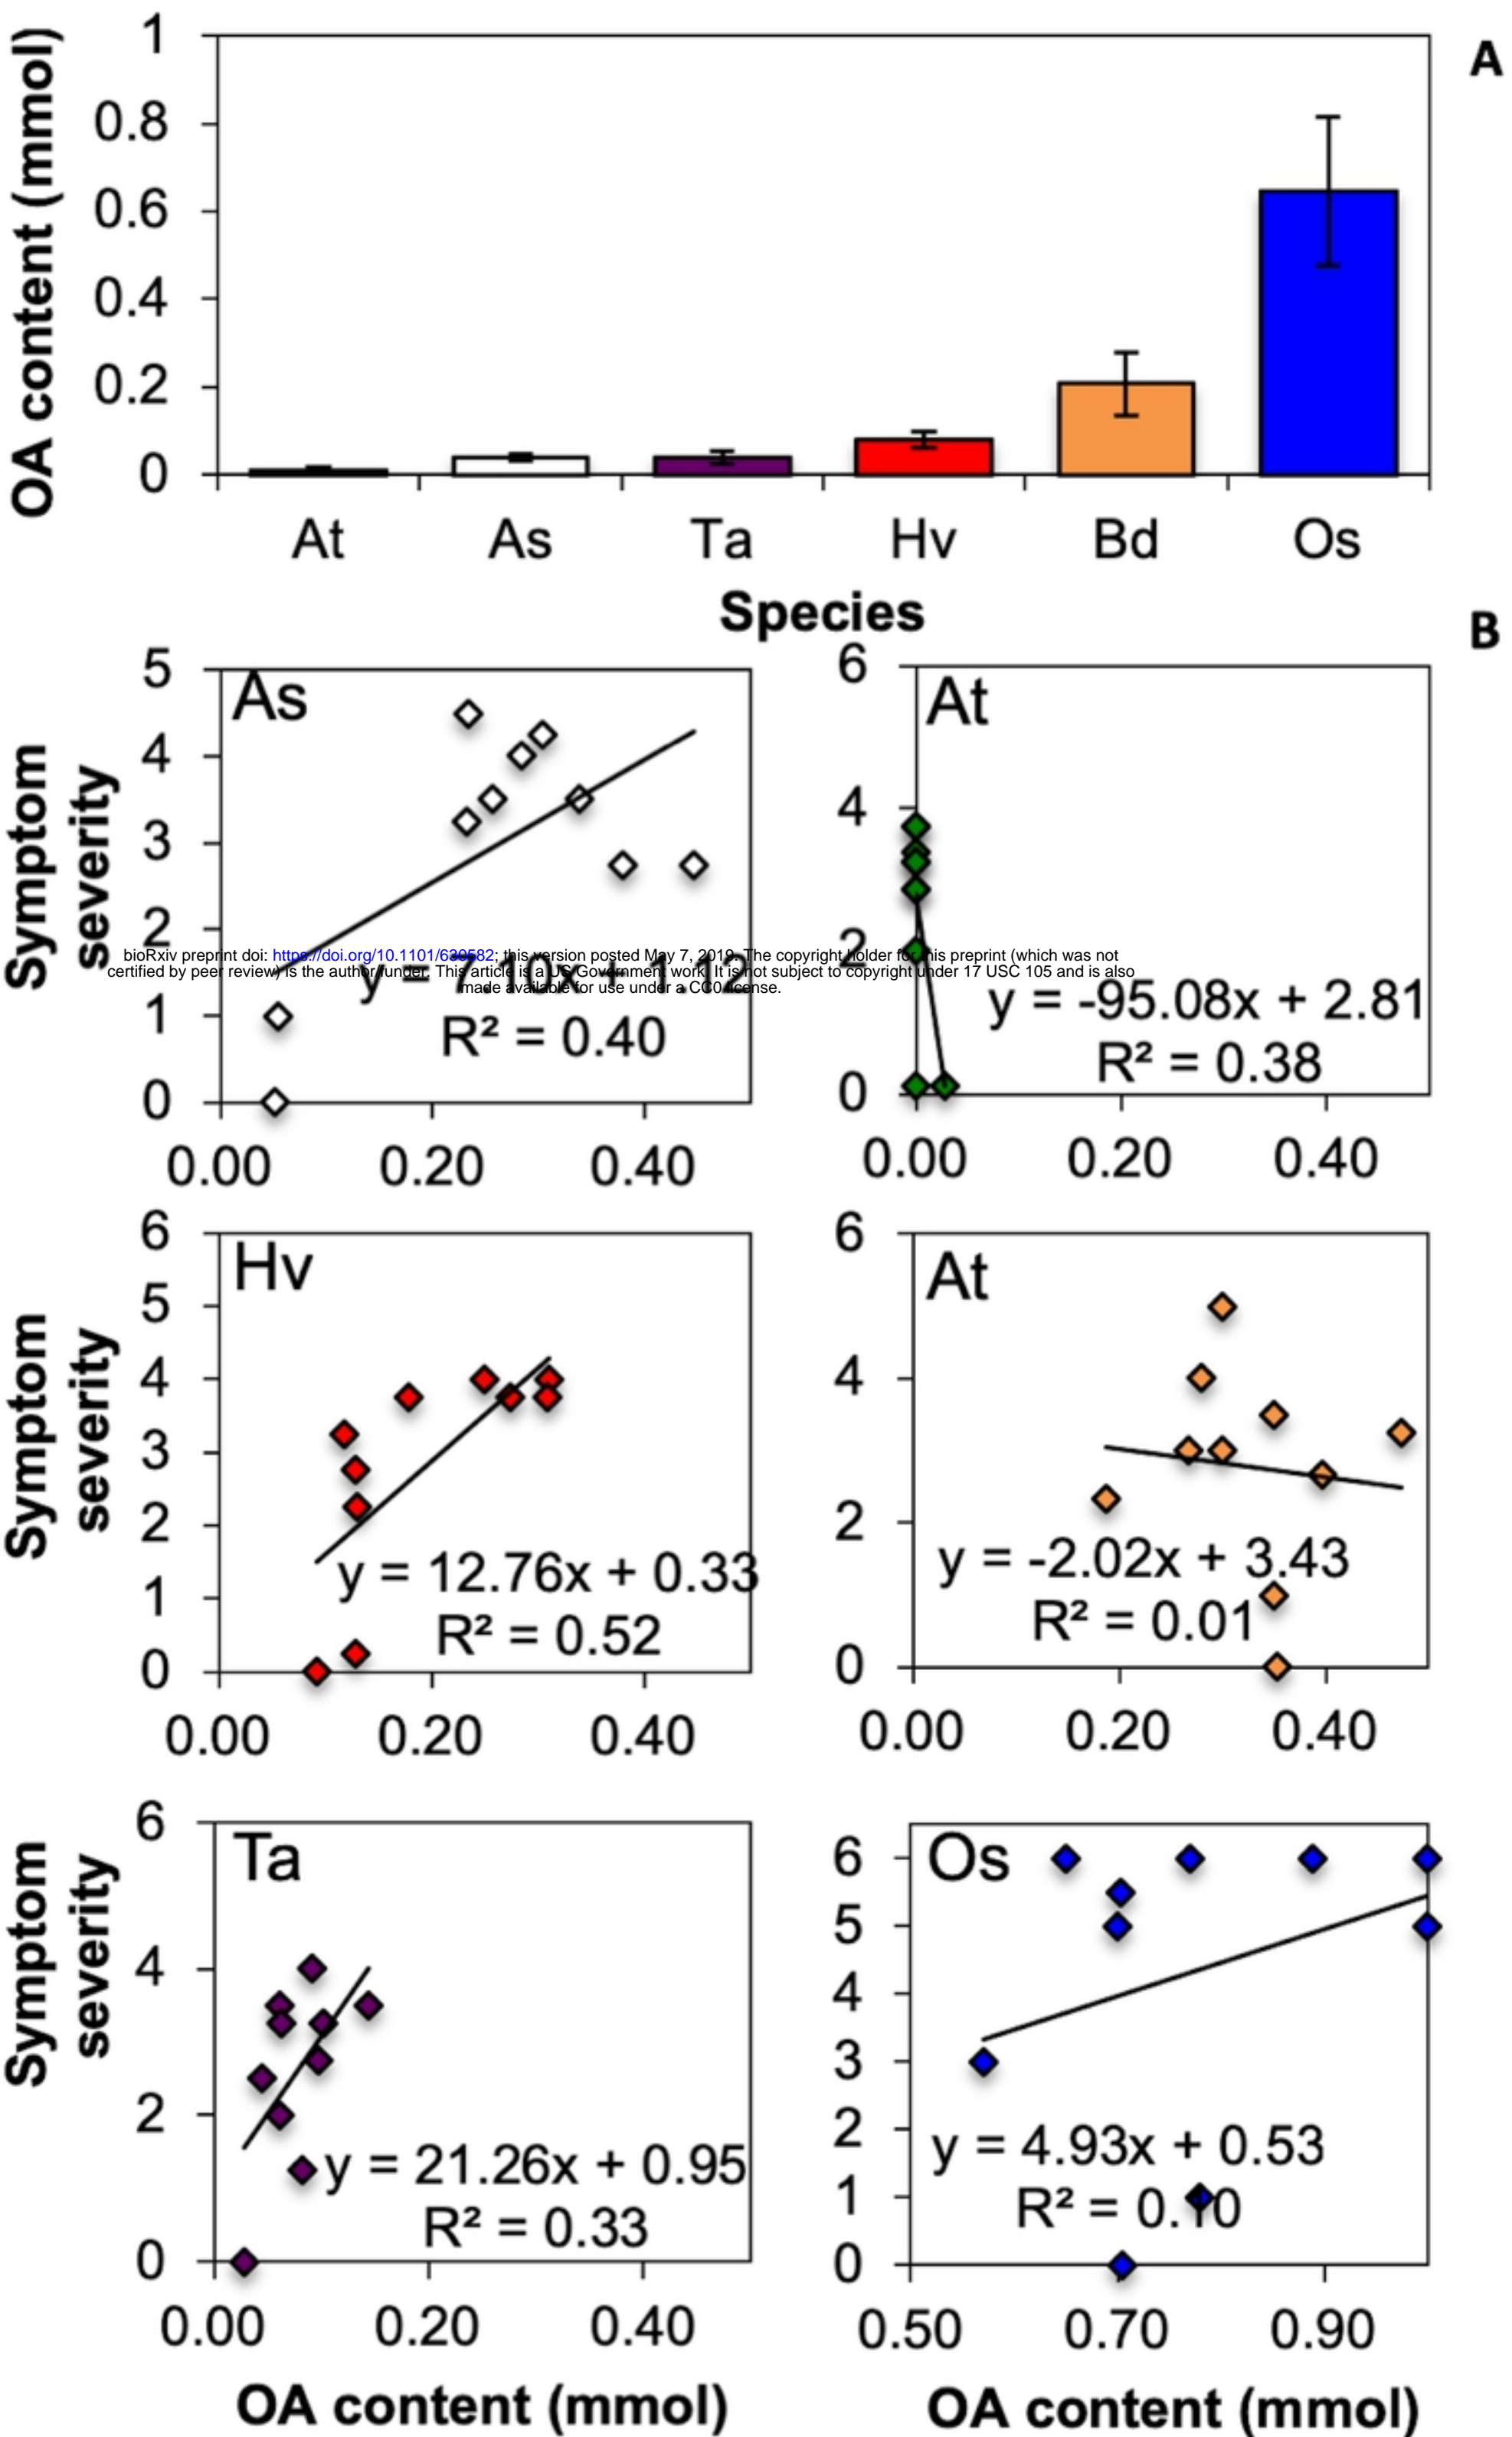

Figure 4
